# Supplementary material for: Rh2(esp)2-catalyzed three-component reaction of a diazo compound, alkyl azide and allylboronate for the synthesis of homoallylic amine derivatives
Source: Royal Society of Chemistry journal article supplement (doi:10.1039/d4nj01189a), 2024-01-01

## ***Supporting Information***

### **Rh<sub>2</sub>(esp)<sub>2</sub>-catalyzed three-component reaction of diazo compound, alkyl azide and allylboronate for synthesis of homoallylic amine derivatives**

Ze-Yu Yi<sup>†</sup>, Na Sun<sup>†</sup>, Peiming Gu, Yang Ji, and Rui Li\*

*State Key Laboratory of High-efficiency Coal Utilization and Green Chemical Engineering, College of Chemistry and Chemical Engineering, Ningxia University, Yinchuan, 750021, China*

Fax: +86(951)206-2323

\*Corresponding author, e-mail: [rui.li@nxu.edu.cn](mailto:rui.li@nxu.edu.cn)

<sup>†</sup>contributed equally

|                                                                 |        |
|-----------------------------------------------------------------|--------|
| General Information :.....                                      | - 2 -  |
| S.1. Experimental Section of the Three-component Reaction ..... | - 3 -  |
| S.2. Conversions of the $\alpha$ -amino ester 4aaa .....        | - 10 - |
| S.3. Spectral and Analytical data of Compounds .....            | - 13 - |
| S.4. X-Ray Data of Compounds 4aab .....                         | - 39 - |

## General Information :

Unless specified, all reactions were carried out under a nitrogen atmosphere with dry solvents under anhydrous conditions. Anhydrous dichloromethane (DCM) and acetonitrile (MeCN) all come from solvent re evaporation systems. Anhydrous acetone is obtained through molecular sieve treatment. Other anhydrous solvents: ethyl acetate (EA), ethanol (C<sub>2</sub>H<sub>5</sub>OH), etc., all come from Energy Chemical. All compounds were subjected to rapid column chromatography using Laishan Jiangye silica gel (200-300 or 300-400 mesh). TLC analyses were performed on EMD 250 m Silica Gel HSGF 254 plates and visualized by quenching of UV fluorescence ( $\lambda_{\text{max}}=254$  nm), or by staining ceric ammonium molybdate, ammonium molybdate, or potassium permanganate. <sup>1</sup>H and <sup>13</sup>C NMR spectra were recorded on a Bruker-500, 400 spectrometer. Chemical shifts for <sup>1</sup>H and <sup>13</sup>C NMR spectra are reported in ppm ( $\delta$ ) relative to residue protium in the solvent (CDCl<sub>3</sub>:  $\delta$  7.26, 77.16 ppm, the multiplicities are presented as follows: s = singlet, d = doublet, t = triplet, q = quartet, m = multiplet). Infrared Spectroscopy (IR) were provided by the Fourier Transform Infrared Spectrometer IR Spirit-L. High-resolution mass spectra (HRMS) were acquired on Thermo fisher Q Exactive HR MS.

## S.1. Experimental Section

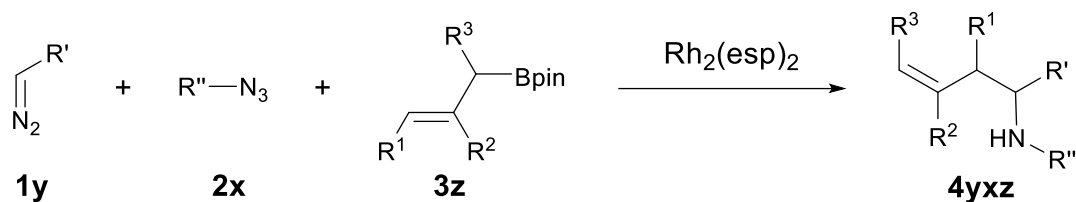

In a 10ml Shlenk reaction tubes, to 2ml DCM dissolved  $\text{Rh}_2(\text{esp})_2$  (0.01%eq 0.01mmol) catalyst solution, azide compound **2x** (2eq 0.2mmol) was added, then 4ml DCM solution of nitrogen compound **1y** (1eq 0.1mmol) was slowly dropped, reacted for 30 min, and then allyl ester **3z** (1.5 eq 0.15mmol) was added for 2 h. Upon completion of the reaction, the DCM was diluted and vacuum-concentrated. By chromatography (ethyl acetate-petroleum ether, 1:10) and purified, the corresponding compound (**4yxz**).

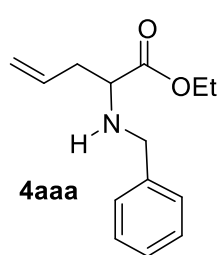

### Ethyl 2-(benzylamino)-pent-4-enoate.

yellow oil.;  $R_f = 0.25$  (EtOAc/PE = 1/10, stain in  $\text{KMnO}_4$ );

$^1\text{H NMR}$  (400 MHz,  $\text{CDCl}_3$ )  $\delta$  7.34 – 7.22 (m, 5H), 5.76 (td,  $J = 17.2, 7.1$  Hz, 1H), 5.26 – 4.87 (m, 2H), 4.19 (q,  $J = 7.1, 6.0$  Hz, 2H), 3.84 (d,  $J = 13.0$  Hz, 1H), 3.68 (d,  $J = 13.0$  Hz, 1H), 3.36 (t,  $J = 6.4$  Hz, 1H), 2.44 (t,  $J = 6.9$  Hz, 2H), 2.05 (s, 1H), 1.33

– 1.21 (m, 3H).  $^{13}\text{C NMR}$  ( $\text{CDCl}_3$ , 100 MHz, plus, APT)  $\delta$  (up) 174.19, 139.32, 118.34, 60.91, 51.98, 37.66.  $\delta$  (down) 133.55, 128.56, 127.36, 60.19, 14.50.

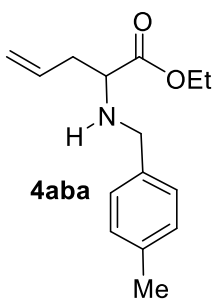

### Ethyl 2-((4-methylbenzyl)amino)pent-4-enoate.

yellow oil;  $R_f = 0.49$  (EtOAc/PE = 1/5, stain in  $\text{KMnO}_4$ );  $^1\text{H NMR}$  (400 MHz,  $\text{CDCl}_3$ )  $\delta$  7.21 (d,  $J = 7.8$  Hz, 2H), 7.12 (d,  $J = 7.8$  Hz, 2H), 5.76 (ddt,  $J = 17.1, 10.1, 7.1$  Hz, 1H), 5.19 – 4.98 (m, 2H), 4.18 (qd,  $J = 7.1, 2.7$  Hz, 2H), 3.80 (d,  $J = 12.8$  Hz, 1H), 3.64 (d,  $J = 12.8$  Hz, 1H), 3.36 (t,  $J = 6.5$  Hz, 1H), 2.43 (t,  $J = 6.8$  Hz, 2H), 2.33 (s, 3H), 1.73 (s, 1H), 1.27 (t,  $J = 7.2$  Hz, 3H).  $^{13}\text{C NMR}$  ( $\text{CDCl}_3$ , 100 MHz, plus, APT)  $\delta$  (up) 174.34, 136.52, 136.41, 117.74, 60.41.  $\delta$  (down) 133.62, 128.91, 128.14, 59.98,

20.96, 14.23.

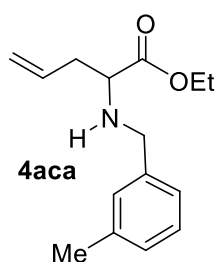

### Ethyl 2-((3-methylbenzyl)amino)pent-4-enoate.

yellow oil;  $R_f = 0.54$  (EtOAc/PE = 1/5, stain in  $\text{KMnO}_4$ );  $^1\text{H NMR}$  (400 MHz,  $\text{CDCl}_3$ )  $\delta$  7.21 (t,  $J = 7.5$  Hz, 1H), 7.16 – 7.09 (m, 2H), 7.06 (d,  $J = 7.5$  Hz, 1H), 5.77 (ddt,  $J = 17.2, 10.2, 7.1$  Hz, 1H), 5.16 – 4.99 (m, 2H), 4.18 (qd,  $J = 7.1, 2.4$  Hz, 2H), 3.80 (d,  $J = 12.8$  Hz, 1H), 3.65 (d,  $J = 12.8$  Hz, 1H), 3.37 (t,  $J = 6.5$  Hz, 1H), 2.45 (t,  $J = 6.8$  Hz, 2H), 2.34 (s, 3H), 1.79 (s, 1H), 1.28 (t,  $J = 7.1$  Hz, 3H).  $^{13}\text{C NMR}$  ( $\text{CDCl}_3$ , 100

MHz, plus, APT)  $\delta$  (up) 174.37, 139.47, 137.82, 117.83, 60.50, 51.88, 37.55.  $\delta$  (down) 133.61, 128.99, 128.19, 127.72, 125.28, 60.16, 14.27. **IR** (film) 3333.53, 1733.3, 1641.97, 1608.91, 1184.6  $\text{cm}^{-1}$ . **HRMS** (ESI-TOF)  $m/z$   $[(M+H)^+]$ , calcd for  $[C_{15}H_{22}NO_2]^+$ : 248.1645, found 248.1642.

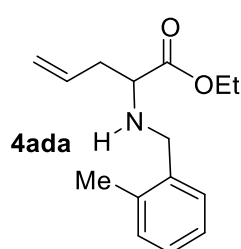

**Ethyl 2-((2-methylbenzyl)amino)-pent-4-enoate.**

yellow oil;  $R_f$  = 0.50 (EtOAc/PE = 1/5, stain in  $KMnO_4$ );

**$^1H$  NMR** (400 MHz,  $CDCl_3$ )  $\delta$  7.31 – 7.27 (m, 1H), 7.21 – 7.11 (m, 3H), 5.78 (ddt,  $J$  = 17.2, 10.1, 7.1 Hz, 1H), 5.17 – 5.00 (m, 2H), 4.19 (qd,  $J$  = 7.1, 2.5 Hz, 2H), 3.81 (d,  $J$  = 12.8 Hz, 1H), 3.65 (d,  $J$  = 12.9 Hz, 1H), 3.37 (t,  $J$  = 6.5 Hz, 1H), 2.47 – 2.41

(m, 2H), 2.35 (s, 3H), 1.73 (s, 1H), 1.28 (t,  $J$  = 7.2 Hz, 3H).  **$^{13}C$  NMR** ( $CDCl_3$ , 100 MHz, plus, APT)  $\delta$  (up) 174.51, 137.55, 136.58, 117.79, 60.55, 49.83, 37.69.  $\delta$  (down) 133.75, 130.19, 128.77, 127.10, 125.80, 60.52, 18.88, 14.30. **IR** (film) 3333.76, 1733.48, 1640.64, 1605.28, 1184.27  $\text{cm}^{-1}$ . **HRMS** (ESI-TOF)  $m/z$   $[(M+H)^+]$ , calcd for  $[C_{15}H_{22}NO_2]^+$ : 248.1645, found 248.1644.

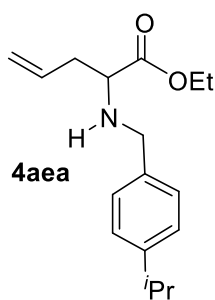

**Ethyl 2-((4-isopropylbenzyl)amino)-pent-4-enoate.**

yellow oil;  $R_f$  = 0.55 (EtOAc/PE = 1/5, stain in  $KMnO_4$ );

**$^1H$  NMR** (400 MHz,  $CDCl_3$ )  $\delta$  7.25 (d,  $J$  = 9.0 Hz, 2H), 7.18 (d,  $J$  = 8.1 Hz, 2H), 5.77 (ddt,  $J$  = 17.2, 10.2, 7.1 Hz, 1H), 5.14 – 5.03 (m, 2H), 4.17 (qd,  $J$  = 7.1, 2.9 Hz, 2H), 3.80 (d,  $J$  = 12.8 Hz, 1H), 3.66 (d,  $J$  = 12.8 Hz, 1H), 3.37 (t,  $J$  = 6.5 Hz, 1H), 2.89 (hept,  $J$  = 6.9 Hz, 1H), 2.44 (t,  $J$  = 6.8 Hz, 2H), 1.77 (s, 1H), 1.30 – 1.22 (m, 9H).  **$^{13}C$**

**NMR** ( $CDCl_3$ , 100 MHz, plus, APT)  $\delta$  (up) 174.48, 147.63, 137.07, 117.85, 60.54, 51.72, 37.66.  $\delta$  (down) 133.74, 128.29, 126.39, 60.27, 33.79, 24.03, 14.35. **IR** (film) 3334.77, 1733.94, 1642.28, 1512.3, 1183.74  $\text{cm}^{-1}$ . **HRMS** (ESI-TOF)  $m/z$   $[(M+H)^+]$ , calcd for  $[C_{17}H_{26}NO_2]^+$ : 276.1958, found 276.1952

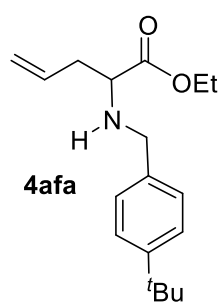

**Ethyl 2-((4-(tert-butyl)benzyl)amino)-pent-4-enoate.**

yellow oil;  $R_f$  = 0.56 (EtOAc/PE = 1/5, stain in  $KMnO_4$ );

**$^1H$  NMR** (400 MHz,  $CDCl_3$ )  $\delta$  7.34 (d,  $J$  = 8.3 Hz, 2H), 7.26 (d,  $J$  = 8.3 Hz, 2H), 5.77 (ddt,  $J$  = 17.2, 10.1, 7.1 Hz, 1H), 5.16 – 5.04 (m, 2H), 4.17 (qd,  $J$  = 7.1, 3.0 Hz, 2H), 3.80 (d,  $J$  = 12.9 Hz, 1H), 3.66 (d,  $J$  = 12.9 Hz, 1H), 3.38 (t,  $J$  = 6.5 Hz, 1H), 2.44 (t,  $J$  = 6.8 Hz, 2H), 1.86 (s, 1H), 1.31 (s, 9H), 1.27 (t,  $J$  = 7.1 Hz, 3H).  **$^{13}C$  NMR** ( $CDCl_3$ , 100

MHz, plus, APT)  $\delta$  (up) 174.40, 149.77, 136.62, 117.81, 60.46, 51.56, 37.62, 34.36.  $\delta$  (down) 133.67, 127.96, 125.18, 60.22, 31.32, 14.30. **IR** (film) 3334.96, 1734.28, 1641.31, 1512.79, 1184.05  $\text{cm}^{-1}$ . **HRMS** (ESI-TOF)  $m/z$   $[(M+H)^+]$ , calcd for  $[C_{18}H_{28}NO_2]^+$ : 290.2115, found 290.2108.

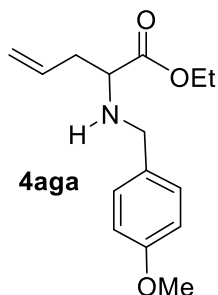

**Ethyl 2-((4-methoxybenzyl)amino)-pent-4-enoate.**

yellow oil;  $R_f = 0.48$  (EtOAc/PE = 1/5, stain in  $\text{KMnO}_4$ );

$^1\text{H NMR}$  (400 MHz,  $\text{CDCl}_3$ )  $\delta$  7.28 – 7.20 (m, 2H), 6.89 – 6.83 (m, 2H), 5.76 (ddt,  $J = 17.2, 10.2, 7.1$  Hz, 1H), 5.14 – 5.03 (m, 2H), 4.18 (qd,  $J = 7.1, 2.3$  Hz, 2H), 3.80 (s, 3H), 3.79 (s, 1H), 3.62 (d,  $J = 12.7$  Hz, 1H), 3.35 (t,  $J = 6.5$  Hz, 1H), 2.43 (t,  $J = 6.8$  Hz, 2H), 1.87 (s, 1H), 1.28 (t,  $J = 7.1$  Hz, 3H).  $^{13}\text{CNMR}$  ( $\text{CDCl}_3$ , 100 MHz, plus, APT)

$\delta$  (up) 174.55, 158.75, 131.82, 117.91, 60.62, 51.37, 37.68.  $\delta$  (down) 133.75, 129.51, 113.77, 60.11, 55.21, 14.39. **IR** (film) 3333.04, 1732.64, 1612.31, 1512.31, 1182.17  $\text{cm}^{-1}$ . **HRMS** (ESI-TOF)  $m/z$  [(M+H) $^+$ ], calcd for  $[\text{C}_{15}\text{H}_{22}\text{NO}_3]^+$ : 264.1594, found 264.1588.

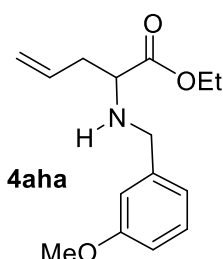

**Ethyl 2-((3-methoxybenzyl)amino)-pent-4-enoate.**

yellow oil;  $R_f = 0.48$  (EtOAc/PE = 1/5, stain in  $\text{KMnO}_4$ );

$^1\text{H NMR}$  (400 MHz,  $\text{CDCl}_3$ )  $\delta$  7.23 (t,  $J = 8.0$  Hz, 1H), 6.90 (d,  $J = 6.6$  Hz, 2H), 6.79 (d,  $J = 8.3$  Hz, 1H), 5.77 (ddt,  $J = 17.2, 10.1, 7.1$  Hz, 1H), 5.14 – 5.05 (m, 2H), 4.18 (qd,  $J = 7.1, 2.8$  Hz, 2H), 3.85 (s, 3H), 3.80 (s, 1H), 3.66 (d,  $J = 13.2$  Hz, 1H), 3.36 (t,  $J = 6.5$  Hz, 1H), 2.44 (t,  $J = 6.8$  Hz, 2H), 1.78 (s, 1H), 1.27 (t,  $J = 7.2$  Hz, 3H).

$^{13}\text{C NMR}$  ( $\text{CDCl}_3$ , 100 MHz, plus, APT)  $\delta$  (up) 174.22, 159.53, 141.19, 117.67, 60.39, 51.66, 37.48.  $\delta$  (down) 133.60, 129.13, 120.32, 113.39, 112.43, 59.93, 54.87, 14.16. **IR** (film) 3336.59, 1732.71, 1598.56, 1463.76, 1184.92  $\text{cm}^{-1}$ . **HRMS** (ESI-TOF)  $m/z$  [(M+H) $^+$ ], calcd for  $[\text{C}_{15}\text{H}_{22}\text{NO}_3]^+$ : 264.1594, found 264.1586.

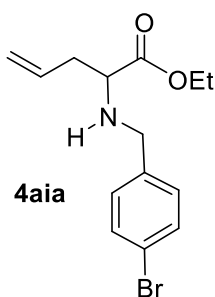

**Ethyl 2-((4-bromobenzyl)amino)-pent-4-enoate.**

yellow oil;  $R_f = 0.49$  (EtOAc/PE = 1/5, stain in  $\text{KMnO}_4$ );

$^1\text{H NMR}$  (400 MHz,  $\text{CDCl}_3$ )  $\delta$  7.43 (d,  $J = 8.3$  Hz, 2H), 7.21 (d,  $J = 8.4$  Hz, 2H), 5.75 (ddt,  $J = 17.2, 10.2, 7.1$  Hz, 1H), 5.16 – 5.04 (m, 2H), 4.18 (qd,  $J = 7.1, 3.1$  Hz, 2H), 3.80 (d,  $J = 13.3$  Hz, 1H), 3.62 (d,  $J = 13.3$  Hz, 1H), 3.32 (t,  $J = 6.4$  Hz, 1H),

2.42 (t,  $J = 6.8$  Hz, 2H), 1.78 (s, 1H), 1.27 (t,  $J = 7.2$  Hz, 3H).  $^{13}\text{C NMR}$  ( $\text{CDCl}_3$ , 100 MHz, plus, APT)  $\delta$  (up) 174.28, 138.68, 120.73, 117.97, 60.61, 51.14, 37.59.  $\delta$  (down) 133.51, 131.32, 129.90, 60.00, 14.31. **IR** (film) 3334.77, 1732.41, 1641.83, 1586.68, 1186.21  $\text{cm}^{-1}$ . **HRMS** (ESI-TOF)  $m/z$  [(M+H) $^+$ ], calcd for  $[\text{C}_{14}\text{H}_{19}\text{BrNO}_2]^+$ : 312.0594, found 312.0590

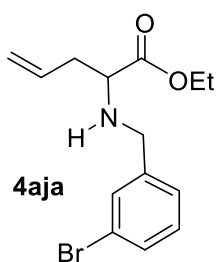

**Ethyl 2-((3-bromobenzyl)amino)-pent-4-enoate.**

yellow oil;  $R_f = 0.50$  (EtOAc/PE = 1/5, stain in  $\text{KMnO}_4$ );

$^1\text{H NMR}$  (400 MHz,  $\text{CDCl}_3$ )  $\delta$  7.50 (s, 1H), 7.38 (d,  $J = 7.9$  Hz, 1H), 7.24 (s, 1H), 7.18 (t,  $J = 7.7$  Hz, 1H), 5.77 (ddt,  $J = 17.2, 10.1, 7.1$  Hz, 1H), 5.20 – 5.05 (m, 2H), 4.19 (qd,  $J = 7.1, 1.9$  Hz, 2H), 3.81 (d,  $J = 13.4$  Hz, 1H), 3.63 (d,  $J = 13.4$  Hz, 1H),

3.32 (t,  $J = 6.4$  Hz, 1H), 2.43 (t,  $J = 6.8$  Hz, 2H), 1.28 (t,  $J = 7.1$  Hz, 3H).  $^{13}\text{C NMR}$  ( $\text{CDCl}_3$ , 100 MHz, plus, APT)  $\delta$  (up) 174.38, 142.24, 122.49, 118.10, 60.74, 51.32, 37.72.  $\delta$  (down) 133.56, 131.23, 130.14, 129.93, 126.80, 60.19, 14.39. **IR** (film) 3335.51, 1732.2, 1641.5, 1594.2, 1188.15  $\text{cm}^{-1}$ . **HRMS** (ESI-TOF)  $m/z$  [(M+H) $^+$ ], calcd for  $[\text{C}_{14}\text{H}_{19}\text{BrNO}_2]^+$ : 312.0594, found 312.0594.

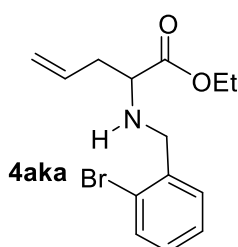

**Ethyl 2-((2-bromobenzyl)amino)-pent-4-enoate.**

yellow oil;  $R_f = 0.61$  (EtOAc/PE = 1/5, stain in  $\text{KMnO}_4$ );

$^1\text{H NMR}$  (400 MHz,  $\text{CDCl}_3$ )  $\delta$  7.57 – 7.46 (m, 1H), 7.41 (dd,  $J = 7.6, 1.8$  Hz, 1H), 7.29 (dd,  $J = 7.4, 1.3$  Hz, 1H), 7.11 (td,  $J = 7.6, 1.8$  Hz, 1H), 5.77 (ddt,  $J = 17.2,$

10.2, 7.1 Hz, 1H), 5.21 – 5.03 (m, 2H), 4.16 (q,  $J = 7.1$  Hz, 2H), 3.92 (d,  $J = 14.0$  Hz, 1H), 3.78 (d,  $J = 14.0$  Hz, 1H), 3.35 (t,  $J = 6.5$  Hz, 1H), 2.45 (td,  $J = 7.1, 3.4$  Hz, 2H), 1.27 (t,  $J = 7.2$  Hz, 3H).  $^{13}\text{C NMR}$  ( $\text{CDCl}_3$ , 100 MHz, plus, APT)  $\delta$  (up) 173.90, 138.61, 123.84, 117.79, 60.44, 51.59, 37.45.  $\delta$  (down) 133.52, 132.47, 130.00, 128.42, 127.19, 60.12. **IR** (film) 3337.53, 1733.07, 1641.47, 1567.9, 1187.32  $\text{cm}^{-1}$ . **HRMS**(ESI-TOF)  $m/z$  [(M+H) $^+$ ], calcd for  $[\text{C}_{14}\text{H}_{19}\text{BrNO}_2]^+$ : 312.0594, found 312.0591

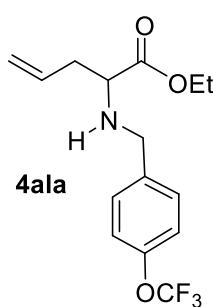

**Ethyl 2-((4-(trifluoromethoxy)benzyl)amino)-pent-4-enoate.**

yellow oil;  $R_f = 0.53$  (EtOAc/PE = 1/5, stain in  $\text{KMnO}_4$ );

$^1\text{H NMR}$  (400 MHz,  $\text{CDCl}_3$ )  $\delta$  7.36 (d,  $J = 8.6$  Hz, 2H), 7.16 (d,  $J = 8.1$  Hz, 2H), 5.76 (ddt,  $J = 17.2, 10.2, 7.1$  Hz, 1H), 5.14 – 5.03 (m, 2H), 4.17 (qt,  $J = 7.2, 3.6$  Hz, 2H), 3.85 (d,  $J = 13.3$  Hz, 1H), 3.68 (d,  $J = 13.3$  Hz, 1H), 3.34 (t,  $J = 6.5$  Hz, 1H), 2.44 (t,

$J = 6.8$  Hz, 2H), 1.63 (s, 1H), 1.27 (t,  $J = 7.2$  Hz, 3H).  $^{13}\text{C NMR}$  ( $\text{CDCl}_3$ , 100 MHz, plus, APT)  $\delta$  (up) 174.39, 148.23, 138.63, 121.80, 117.96, 60.67, 51.15, 37.67.  $\delta$  (down) 133.60, 129.56, 120.88, 60.26, 14.24. **IR** (film) 3335.95, 1733.38, 1643.37, 1507.44, 1174.42  $\text{cm}^{-1}$ . **HRMS** (ESI-TOF)  $m/z$  [(M+H) $^+$ ], calcd for  $[\text{C}_{15}\text{H}_{19}\text{F}_3\text{NO}_3]^+$ : 318.1312, found 318.1304.

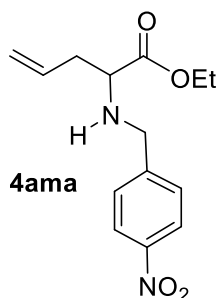

**Ethyl 2-((4-nitrobenzyl)amino)-pent-4-enoate.**

yellow oil;  $R_f = 0.58$  (EtOAc/PE = 1/2, stain in  $\text{KMnO}_4$ );

$^1\text{H NMR}$  (400 MHz,  $\text{CDCl}_3$ )  $\delta$  8.18 (d,  $J = 8.7$  Hz, 2H), 7.52 (d,  $J = 8.4$  Hz, 2H), 5.77 (ddt,  $J = 17.2, 10.2, 7.1$  Hz, 1H), 5.19 – 5.04 (m, 2H), 4.20 (qd,  $J = 7.2, 4.2$  Hz, 2H), 3.98 (d,  $J = 14.3$  Hz, 1H), 3.76 (d,  $J = 14.3$  Hz, 1H), 3.32 (t,  $J = 6.4$  Hz, 1H), 2.46 (t,  $J = 6.9$  Hz, 2H), 1.77 (s, 1H), 1.28 (t,  $J = 7.1$  Hz, 3H).  $^{13}\text{C NMR}$  ( $\text{CDCl}_3$ , 100 MHz, plus, APT)  $\delta$  (up) 174.13, 147.59, 146.92, 118.11, 60.76, 51.01, 37.56.  $\delta$  (down)

133.36, 128.65, 123.44, 60.18, 14.25. **IR** (film) 3341.5, 1732.12, 1602.04, 1521.59, 1188.94  $\text{cm}^{-1}$ . **HRMS** (ESI-TOF)  $m/z$  [(M+H) $^+$ ], calcd for  $[\text{C}_{14}\text{H}_{19}\text{N}_2\text{O}_4]^+$ : 279.1339, found 279.1332.

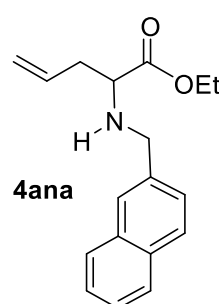

**Ethyl 2-((naphthalen-2-ylmethyl)amino)-pent-4-enoate.**

yellow oil;  $R_f = 0.43$  (EtOAc/PE = 1/5, stain in  $\text{KMnO}_4$ );

$^1\text{H NMR}$  (400 MHz,  $\text{CDCl}_3$ )  $\delta$  7.86 – 7.78 (m, 3H), 7.76 (s, 1H), 7.52 – 7.41 (m, 3H), 5.79 (ddt,  $J = 17.2, 10.2, 7.1$  Hz, 1H), 5.16 – 5.06 (m, 2H), 4.18 (qd,  $J = 7.1, 3.2$  Hz, 2H), 4.02 (d,  $J = 13.2$  Hz, 1H), 3.86 (d,  $J = 13.2$  Hz, 1H), 3.41 (t,  $J = 6.5$  Hz, 1H), 2.47 (t,  $J = 6.8$  Hz, 2H), 1.96 (s, 1H), 1.27 (t,  $J = 7.1$  Hz, 3H).  $^{13}\text{C NMR}$  ( $\text{CDCl}_3$ , 100 MHz, plus, APT)  $\delta$  (up) 174.51, 137.20, 133.41, 132.75, 117.97, 60.65, 52.11, 37.70.  $\delta$

(down) 133.75, 128.08, 127.73, 127.65, 126.74, 126.71, 125.99, 125.60, 60.21, 14.36. **IR** (film) 3334.33, 1731.8, 1639.75, 1507.99, 1185.3  $\text{cm}^{-1}$ . **HRMS** (ESI-TOF)  $m/z$  [(M+H) $^+$ ], calcd for  $[\text{C}_{18}\text{H}_{22}\text{NO}_2]^+$ : 284.1645, found 284.1637.

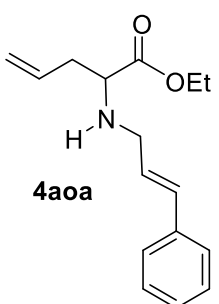

**Ethyl 2-(cinnamylamino)-pent-4-enoate.**

yellow oil;  $R_f = 0.40$  (EtOAc/PE = 1/5, stain in  $\text{KMnO}_4$ );

$^1\text{H NMR}$  (400 MHz,  $\text{CDCl}_3$ )  $\delta$  7.36 (d,  $J = 7.2$  Hz, 2H), 7.30 (t,  $J = 7.5$  Hz, 2H), 7.22 (d,  $J = 14.5$  Hz, 1H), 6.51 (d,  $J = 15.9$  Hz, 1H), 6.24 (dt,  $J = 15.9, 6.4$  Hz, 1H), 5.77 (ddt,  $J = 17.2, 10.1, 7.1$  Hz, 1H), 5.17 – 5.06 (m, 2H), 4.18 (qq,  $J = 7.1, 3.6$  Hz, 2H), 3.48 – 3.40 (m, 1H), 3.38 (d,  $J = 6.4$  Hz, 1H), 3.32 (dd,  $J = 13.7, 6.4$  Hz, 1H), 2.44 (t,  $J = 6.8$  Hz, 2H), 1.77 (s, 1H), 1.26 (t,  $J = 7.1$  Hz, 3H).  $^{13}\text{C NMR}$  ( $\text{CDCl}_3$ , 100 MHz, plus,

APT)  $\delta$  (up) 174.43, 136.84, 118.08, 60.59, 50.10, 37.63.  $\delta$  (down) 133.40, 131.83, 128.42, 127.59, 127.34, 126.22, 60.03, 14.25. **IR** (film) 3330.83, 1732.5, 1642.44, 1586.24, 1185.39  $\text{cm}^{-1}$ . **HRMS** (ESI-TOF)  $m/z$  [(M+H) $^+$ ], calcd for  $[\text{C}_{16}\text{H}_{22}\text{NO}_2]^+$ : 260.1645, found 260.1640.

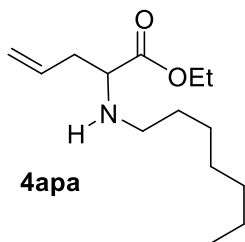

**Ethyl 2-(heptylamino)-pent-4-enoate.**

yellow oil;  $R_f = 0.55$  (EtOAc/PE = 1/5, stain in  $\text{KMnO}_4$ );

$^1\text{H NMR}$  (400 MHz,  $\text{CDCl}_3$ )  $\delta$  5.75 (ddt,  $J = 17.2, 10.2, 7.1$  Hz, 1H), 5.14 – 5.04 (m, 2H), 4.18 (qd,  $J = 7.1, 2.6$  Hz, 2H), 3.32 (t,  $J = 6.5$  Hz, 1H), 2.62 – 2.45 (m, 2H), 2.41 (t,  $J = 6.9$  Hz, 2H), 1.61 (s, 1H), 1.27 (t,  $J = 7.1$  Hz, 8H), 0.87 (q,  $J = 7.0, 6.1$  Hz, 3H).  $^{13}\text{C NMR}$  ( $\text{CDCl}_3$ , 100 MHz, plus, APT)  $\delta$  (up) 174.38, 117.56, 60.24, 47.96, 37.52, 31.60, 29.89, 28.96, 27.00, 22.39.  $\delta$  (down) 133.52, 60.95, 14.11, 13.83. **IR** (film) 3332.17, 2928.13, 1735.64, 1181.08  $\text{cm}^{-1}$ . **HRMS** (ESI-TOF)  $m/z$   $[(M+H)^+]$ , calcd for  $[\text{C}_{14}\text{H}_{28}\text{NO}_2]^+$  : 242.2115, found 242.2107.

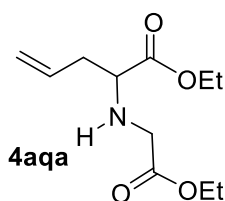

**Ethyl 2-((2-ethoxy-2-oxoethyl)amino)-pent-4-enoate.**

yellow oil;  $R_f = 0.32$  (EtOAc/PE = 1/5, stain in  $\text{KMnO}_4$ );

$^1\text{H NMR}$  (400 MHz,  $\text{CDCl}_3$ )  $\delta$  5.78 (ddt,  $J = 17.2, 10.1, 7.1$  Hz, 1H), 5.19 – 5.08 (m, 2H), 4.17 (q,  $J = 7.1$  Hz, 4H), 3.42 – 3.37 (m, 1H), 2.53 – 2.41 (m, 2H), 1.98 (s, 1H), 1.27 (d,  $J = 3.8$  Hz, 6H).  $^{13}\text{C NMR}$  ( $\text{CDCl}_3$ , 100 MHz, plus, APT)  $\delta$  (up) 173.31, 171.40, 118.13, 60.57, 48.69, 37.11.  $\delta$  (down) 133.09, 59.85, 24.31, 14.03, 13.91

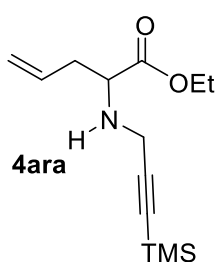

**Ethyl 2-((3-(trimethylsilyl)prop-2-yn-1-yl)amino)-pent-4-enoate.**

yellow oil;  $R_f = 0.37$  (EtOAc/PE = 1/10, stain in  $\text{KMnO}_4$ );

$^1\text{H NMR}$  (400 MHz,  $\text{CDCl}_3$ )  $\delta$  5.74 (ddt,  $J = 17.2, 10.2, 7.1$  Hz, 1H), 5.17 – 5.08 (m, 2H), 4.19 (dd,  $J = 7.1, 5.7$  Hz, 2H), 3.51 (t,  $J = 6.3$  Hz, 1H), 3.46 (s, 1H), 3.39 (d,  $J = 17.1$  Hz, 1H), 2.52 – 2.37 (m, 2H), 1.77 (s, 1H), 1.28 (t,  $J = 7.1$  Hz, 3H), 0.15 (s, 9H).  $^{13}\text{C NMR}$  ( $\text{CDCl}_3$ , 100 MHz, plus, APT)  $\delta$  (up) 173.61, 118.14, 103.73, 60.69, 37.66, 37.17.  $\delta$  (down) 133.41, 59.19, 14.21, 0.17. **IR** (film) 3336.9, 2173.81, 1735.7, 1188.07, 847.48  $\text{cm}^{-1}$ . **HRMS** (ESI-TOF)  $m/z$   $[(M+H)^+]$ , calcd for  $[\text{C}_{13}\text{H}_{24}\text{NO}_2\text{Si}]^+$  : 254.1571, found 254.1567.

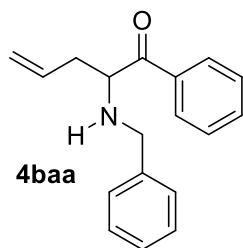

**N-benzyl-1-(trimethylsilyl)but-3-en-1-amine.**

yellow oil;  $R_f = 0.20$  (EtOAc/PE = 1/5, stain in  $\text{KMnO}_4$ );

$^1\text{H NMR}$  (400 MHz,  $\text{CDCl}_3$ )  $\delta$  7.29 – 7.25 (m, 5H), 5.76 (ddt,  $J = 17.1, 10.1, 7.1$  Hz, 1H), 5.08 – 4.96 (m, 2H), 3.81 (d,  $J = 12.9$  Hz, 1H), 3.68 (d,  $J = 12.9$  Hz, 1H), 2.43 – 2.33 (m, 1H), 2.18 (dt,  $J = 14.2, 7.3$  Hz, 1H), 2.09 (dd,  $J = 7.2, 4.9$  Hz, 1H), 1.48 (s, 1H), -0.00 (s, 9H).  $^{13}\text{C NMR}$  ( $\text{CDCl}_3$ , 100 MHz, plus, APT)  $\delta$  (up) 116.57, 53.14, 34.78.  $\delta$  (down) 137.57, 128.43, 128.38, 126.94, 46.93, 2.37. **IR** (film) 1452.69, 1602, **HRMS** (ESI-TOF)  $m/z$   $[(M+H)^+]$ , calcd for  $[\text{C}_{14}\text{H}_{24}\text{NSi}]^+$  : 234.1673, found 234.1666.



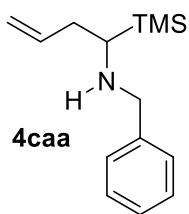

**N-benzyl-1-(trimethylsilyl)but-3-en-1-amine.**

yellow oil;  $R_f = 0.20$  (EtOAc/PE = 1/5, stain in  $\text{KMnO}_4$ );

$^1\text{H NMR}$  (400 MHz,  $\text{CDCl}_3$ )  $\delta$  7.29 – 7.25 (m, 5H), 5.76 (ddt,  $J = 17.1, 10.1, 7.1$  Hz, 1H), 5.08 – 4.96 (m, 2H), 3.81 (d,  $J = 12.9$  Hz, 1H), 3.68 (d,  $J = 12.9$  Hz, 1H), 2.43 –

2.33 (m, 1H), 2.18 (dt,  $J = 14.2, 7.3$  Hz, 1H), 2.09 (dd,  $J = 7.2, 4.9$  Hz, 1H), 1.48 (s, 1H), -0.00 (s, 9H).  $^{13}\text{C NMR}$  ( $\text{CDCl}_3$ , 100 MHz, plus, APT)  $\delta$  (up) 116.57, 53.14, 34.78.  $\delta$  (down) 137.57, 128.43, 128.38, 126.94, 46.93, 2.37. **IR** (film) 1452.69, 1602, **HRMS** (ESI-TOF)  $m/z$  [(M+H) $^+$ ], calcd for  $[\text{C}_{14}\text{H}_{24}\text{NSi}]^+$  : 234.1673, found 234.1666.

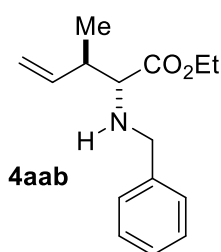

**Ethyl 2-(benzylamino)-3-methylpent-4-enoate.**

yellow oil;  $R_f = 0.52$  (EtOAc/PE = 1/5, stain in  $\text{KMnO}_4$ );

$^1\text{H NMR}$  (400 MHz,  $\text{CDCl}_3$ )  $\delta$  7.35 – 7.29 (m, 3H), 7.25 – 7.21 (m, 1H), 5.80 – 5.68 (m, 1H), 5.09 – 5.02 (m, 2H), 4.19 (qd,  $J = 7.2, 4.4$  Hz, 2H), 3.85 (d,  $J = 13.2$  Hz, 1H),

3.61 (d,  $J = 13.2$  Hz, 1H), 3.12 (d,  $J = 6.2$  Hz, 1H), 2.55 (q,  $J = 6.4, 5.8$  Hz, 1H), 1.82 (s, 1H), 1.28 (t,  $J = 7.1$  Hz, 3H), 1.07 (d,  $J = 6.9$  Hz, 3H).  $^{13}\text{C NMR}$  ( $\text{CDCl}_3$ , 100 MHz, plus, APT)  $\delta$  (up) 174.26, 139.87, 115.52, 60.42, 52.37.  $\delta$  (down) 139.58, 128.21, 126.92, 65.26, 40.95, 16.67, 14.34. **IR** (film) 3339.22, 1732.19, 1604.23, 1459.59, 1186.8  $\text{cm}^{-1}$ . **HRMS** (ESI-TOF)  $m/z$  [(M+H) $^+$ ], calcd for  $[\text{C}_{15}\text{H}_{22}\text{NO}_2]^+$  : 248.1645, found 248.1640.

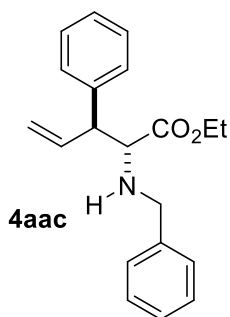

**Ethyl 2-(benzylamino)-3-phenylpent-4-enoate.**

yellow oil;  $R_f = 0.56$  (EtOAc/PE = 1/5, stain in  $\text{KMnO}_4$ );

$^1\text{H NMR}$  (400 MHz,  $\text{CDCl}_3$ )  $\delta$  7.33 – 7.18 (m, 10H), 6.14 (ddd,  $J = 17.1, 10.2, 8.2$  Hz, 1H), 5.19 – 5.05 (m, 2H), 3.95 (q,  $J = 7.1$  Hz, 2H), 3.83 (d,  $J = 13.3$  Hz, 1H), 3.62 (d,  $J = 9.3$  Hz, 1H), 3.61 – 3.56 (m, 1H), 3.53 (d,  $J = 7.9$  Hz, 1H), 1.96 (s, 1H),

1.01 (t,  $J = 7.1$  Hz, 3H).  $^{13}\text{C NMR}$  ( $\text{CDCl}_3$ , 100 MHz, plus, APT)  $\delta$  (up) 173.78, 140.49, 139.67, 117.41, 60.49, 52.36.  $\delta$  (down) 137.77, 128.42, 128.36, 128.33, 128.27, 127.05, 126.89, 65.50, 53.44, 14.05. **IR** (film) 3333.73, 1731.41, 1601.25, 1490.26, 1182.13  $\text{cm}^{-1}$ . **HRMS** (ESI-TOF)  $m/z$  [(M+H) $^+$ ], calcd for  $[\text{C}_{20}\text{H}_{24}\text{NO}_2]^+$  : 310.1802, found 310.1798.

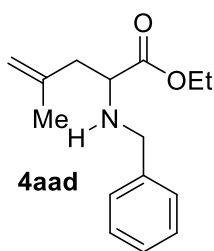

**Ethyl 2-(benzylamino)-4-methylpent-4-enoate.**

yellow oil;  $R_f = 0.50$  (EtOAc/PE = 1/5, stain in  $\text{KMnO}_4$ );

$^1\text{H NMR}$  (400 MHz,  $\text{CDCl}_3$ )  $\delta$  7.22 (d,  $J = 18.6\text{ Hz}$ , 5H), 4.74 (s, 1H), 4.68 (s, 1H), 4.11 (q,  $J = 7.1\text{ Hz}$ , 2H), 3.77 (d,  $J = 13.0\text{ Hz}$ , 1H), 3.59 (d,  $J = 13.0\text{ Hz}$ , 1H), 3.36 (t,  $J = 7.3$

Hz, 1H), 2.30 (d,  $J = 7.3\text{ Hz}$ , 2H), 1.71 (s, 1H), 1.62 (s, 3H), 1.21 (t,  $J = 7.2\text{ Hz}$ , 3H).  $^{13}\text{C NMR}$  ( $\text{CDCl}_3$ , 100 MHz, plus, APT)  $\delta$  (up) 175.06, 141.59, 139.74, 113.77, 60.76, 52.23, 42.06.  $\delta$ (down) 128.51, 128.43, 127.22, 59.11, 22.09, 14.47.

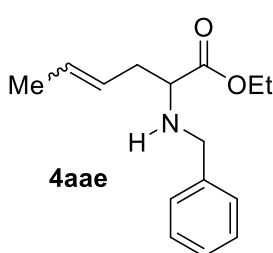

**Ethyl 2-(benzylamino)hex-4-enoate.**

yellow oil;  $R_f = 0.52$  (EtOAc/PE = 1/5, stain in  $\text{KMnO}_4$ );

$^1\text{H NMR}$  (400 MHz,  $\text{CDCl}_3$ )  $\delta$  7.35 – 7.21 (m, 5H), 5.64 – 5.47 (m, 1H), 5.37 (dddd,  $J = 17.1, 10.1, 7.2, 3.4, 1.7\text{ Hz}$ , 1H), 4.18 (ddp,  $J = 10.2, 7.1, 3.4\text{ Hz}$ ,

2H), 3.83 (dd,  $J = 13.0, 1.5\text{ Hz}$ , 1H), 3.66 (dd,  $J = 13.0, 3.5\text{ Hz}$ , 1H), 3.32 (dt,  $J = 10.4, 6.5\text{ Hz}$ , 1H), 2.44 (q,  $J = 7.1\text{ Hz}$ , 1H), 2.40 – 2.31 (m, 1H), 1.85 (s, 1H), 1.70 – 1.57 (m, 3H), 1.28 (td,  $J = 7.1, 2.7\text{ Hz}$ , 3H).  $^{13}\text{C NMR}$  ( $\text{CDCl}_3$ , 100 MHz, plus, APT)  $\delta$  (up) 174.75, 174.66, 139.84, 60.56, 60.49, 52.03, 52.00, 36.54, 30.83.  $\delta$  (down) 128.63, 128.36, 128.30, 128.24, 127.03, 126.95, 125.99, 125.19, 60.63, 60.60, 17.97, 14.38, 14.34, 12.94. IR (film) 3332.64, 1732.47, 1587.13, 1455.86, 1182.98  $\text{cm}^{-1}$ . HRMS (ESI-TOF)  $m/z$  [(M+H) $^+$ ], calcd for  $[\text{C}_{15}\text{H}_{22}\text{NO}_2]^+$  : 248.1645, found 248.1641.

**S.2. Conversions of the  $\alpha$ -amino ester 4aaa and 4aab**

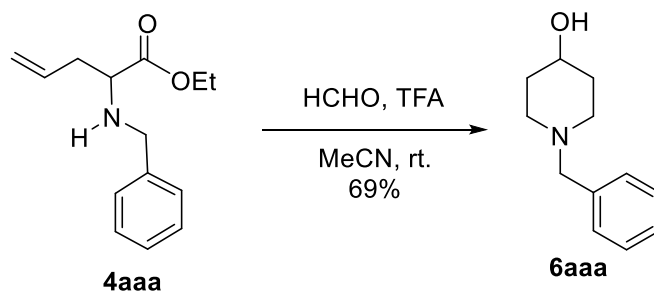

In a 10ml Shlenk reaction tubes, to a solution of 4aaa (1.0 mmol) in MeCN (1.0 mL) were sequentially added formaldehyde (37% solution in  $\text{H}_2\text{O}$ , 0.8 mL, 10 mmol) and TFA (1.2 mmol). The reaction mixture was stirred at room temperature 1h. It was then treated with saturated aqueous  $\text{NaHCO}_3$  (2.0 mL), and

the resulting mixture was extracted with DCM (3\*10 mL). The combined organic layers were washed with brine, dried with Na<sub>2</sub>SO<sub>4</sub>, and concentrated. The residue was purified by column chromatography.

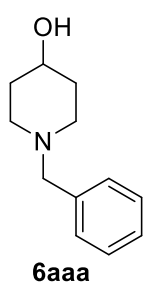

**1-Benzylpiperidin-4-ol.**

Colorless oil;  $R_f$  = 0.05 (EtOAc, stain in PMA);

<sup>1</sup>H NMR (500 MHz, CDCl<sub>3</sub>) δ 7.33 (d,  $J$  = 4.4 Hz, 4H), 7.28 – 7.24 (m, 1H), 3.71 (tt,  $J$  = 8.9, 4.2 Hz, 1H), 3.51 (s, 2H), 2.77 (dt,  $J$  = 10.3, 4.4 Hz, 2H), 2.23 – 2.09 (m, 2H), 1.89 (dq,  $J$  = 11.8, 3.3, 2.6 Hz, 2H), 1.60 (dtd,  $J$  = 13.1, 9.4, 3.7 Hz, 2H), 1.48 (s, 1H). <sup>13</sup>C NMR (126 MHz,

CDCl<sub>3</sub>, CPD) δ 138.70, 129.23, 128.34, 127.12, 68.34, 63.10, 51.17, 34.73.

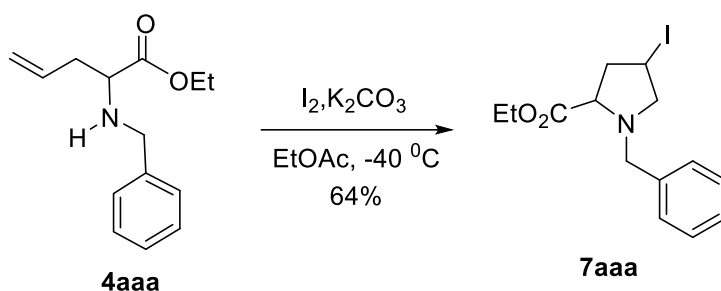

In a 10ml Shlenk reaction tubes, to a stirred solution of **4aaa** (1 mmol) in EtOAc(4 mL) was successively added K<sub>2</sub>CO<sub>3</sub> (5 mmol) and iodine (3 mmol) at -40°C. The mixture was stirred at the same temperature for 1.5 h, diluted with AcOEt (20 mL), and extracted with 20% aqueous Na<sub>2</sub>S<sub>2</sub>O<sub>3</sub> solution (20 mL × 3). The organic solution was washed with H<sub>2</sub>O (20 mL × 3) and brine (20 mL × 3), dried, and evaporated. The residue was purified by column chromatography.

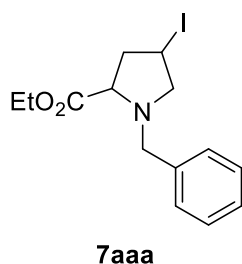

**Eethyl 1-benzyl-4-iodopyrrolidine-2-carboxylate**

yellow oil;  $R_f$  = 0.49 (EtOAc/PE = 1/10, stain in KMnO<sub>4</sub>);

<sup>1</sup>H NMR (400 MHz, CDCl<sub>3</sub>) δ 7.35 – 7.29 (m, 4H), 7.26 (s, 1H), 4.17 – 4.05 (m, 2H), 3.94 (d,  $J$  = 12.7 Hz, 1H), 3.70 (d,  $J$  = 12.7 Hz, 1H), 3.48 (t,  $J$  = 8.3 Hz, 1H), 3.31 – 3.23 (m, 1H), 2.91 (t,  $J$  = 9.4 Hz, 1H), 2.85 (dd,  $J$  = 9.5, 4.6 Hz, 1H), 2.43 (ddd,  $J$  =

10.8, 8.2, 7.2 Hz, 1H), 1.91 (dt,  $J$  = 10.8, 8.3 Hz, 1H), 1.20 (t,  $J$  = 7.1 Hz, 3H). <sup>13</sup>C NMR (126 MHz, CDCl<sub>3</sub>, CPD) δ 172.35, 137.21, 129.62, 128.50, 127.71, 62.92, 61.18, 60.84, 58.82, 29.34, 14.28, 10.64.

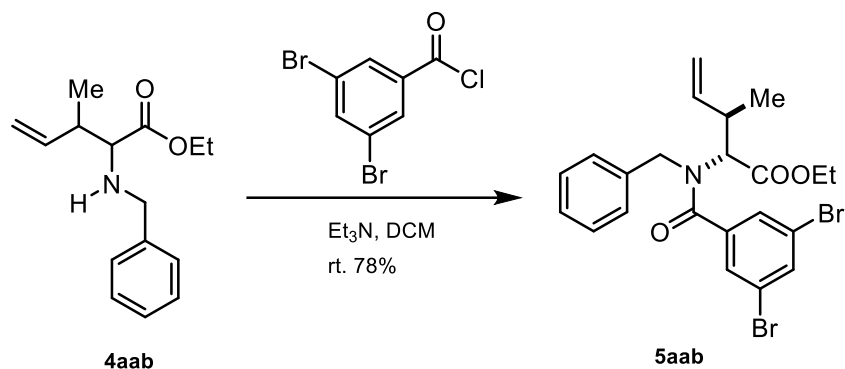

In a 10 ml Shlenk reaction tube, a solution of Et<sub>3</sub>N (1.2 eq) and 3,5 dibromobenzoyl chloride (1.2 eq) in DCM (2 ml) was added sequentially to a stirred solution in DCM (3 ml) at 0°C. The mixture was stirred at the same temperature for 0.5 h. 2 ml of 4aab (1 mmol, 1eq) dissolved in DCM was added to the reaction and the reaction was continued for 1h. Diluted with water (10 mL), and extracted with DCM (10 mL × 3). The organic solution was washed with H<sub>2</sub>O (20 mL × 3) and brine (20 mL × 3), dried and evaporated. The residue was purified by column chromatography.

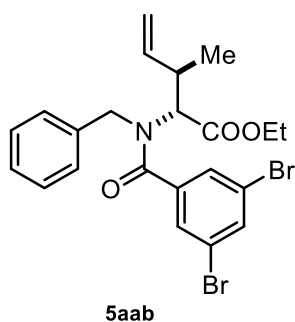

**Ethyl-2-(N-benzyl-3,5-dibromobenzamido)-3-methylpent-4-enoate**

Colorless oil; *R<sub>f</sub>* = 0.55 (EtOAc/PE = 1/5, stain in KMnO<sub>4</sub>);

<sup>1</sup>H NMR (500 MHz, CDCl<sub>3</sub>) δ 7.39 – 7.20 (m, 8H), 5.83 – 5.67 (m, 1H), 5.11 – 5.05 (m, 2H), 4.23 (qd, *J* = 7.0, 4.9 Hz, 2H), 3.91 (d, *J* = 13.5 Hz, 1H), 3.66 (d, *J* = 13.5 Hz, 1H), 3.17 (d, *J* = 6.2 Hz, 1H), 2.55 (q, *J* = 6.4, 5.8 Hz, 1H), 1.82 (s,

1H), 1.28 (t, *J* = 7.0 Hz, 3H), 1.15 (d, *J* = 6.9 Hz, 3H). <sup>13</sup>C NMR (CDCl<sub>3</sub>, 126 MHz, CPD) δ 175.17, 174.26, 140.15, 138.89, 137.89, 135.32, 129.86, 128.28, 127.87, 127.37, 126.09, 124.97, 117.62, 116.34, 65.71, 61.42, 51.90, 41.00, 17.35, 14.40.

### S.3. Spectral and Analytical data of Compounds

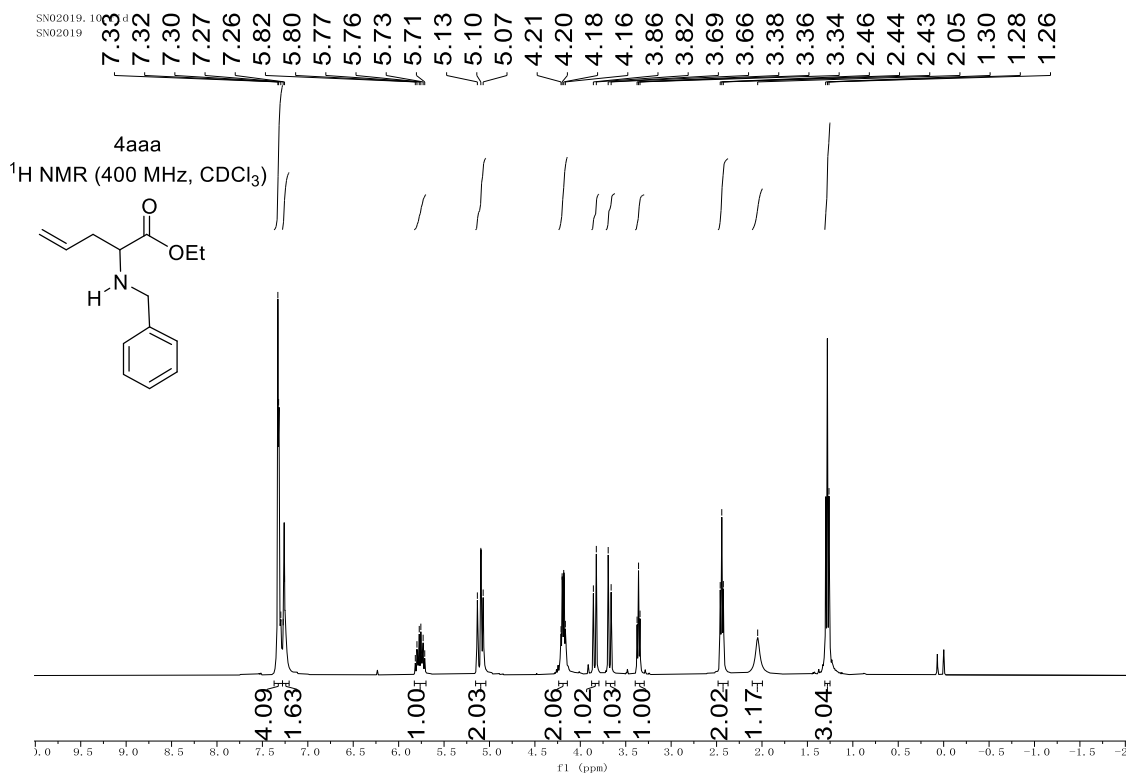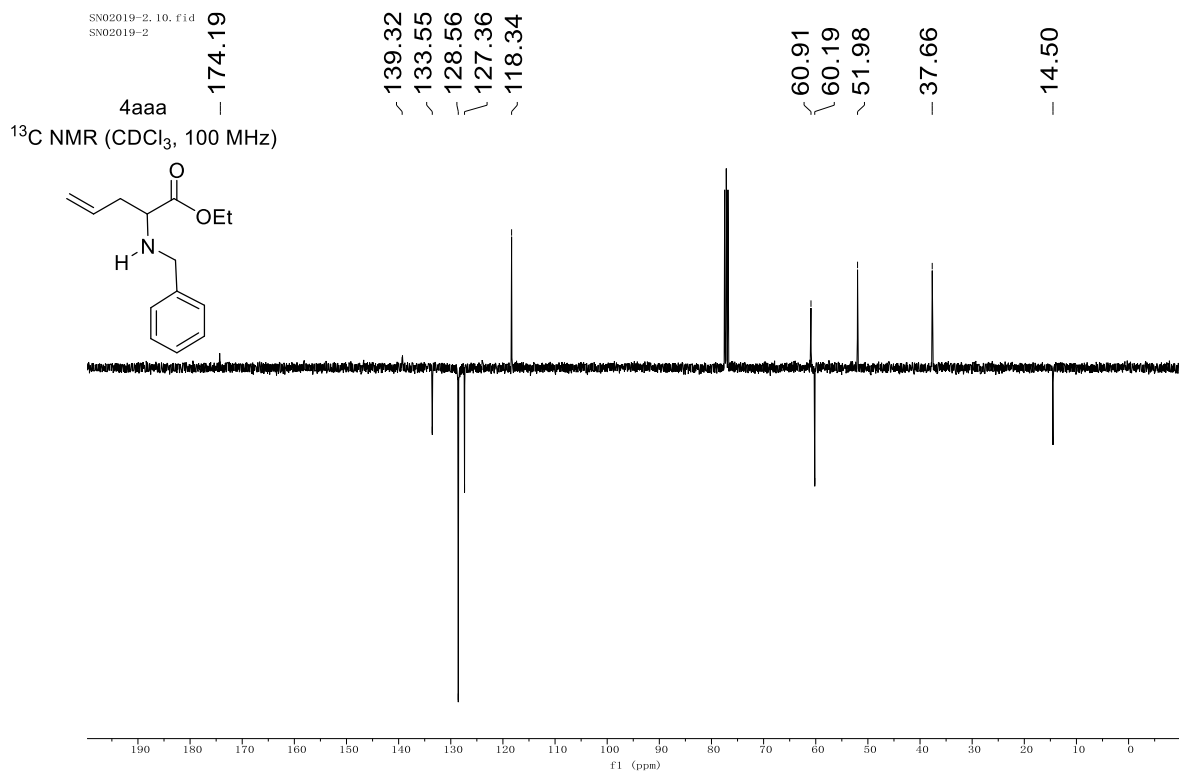

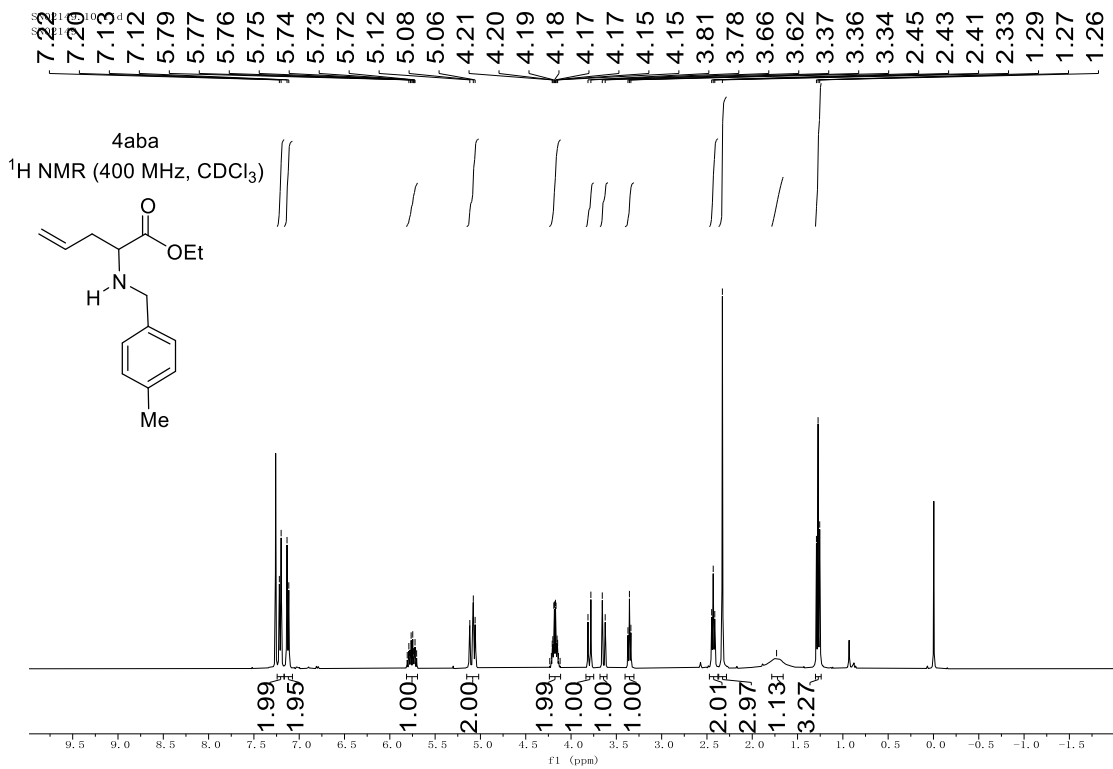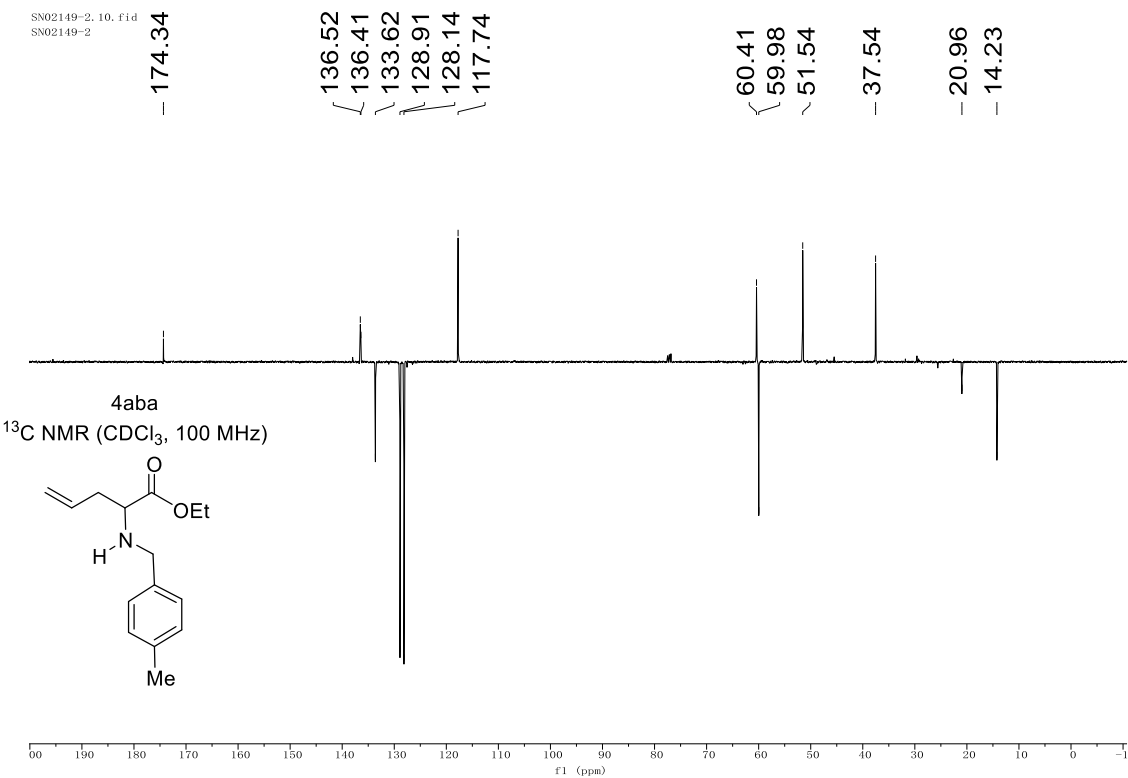

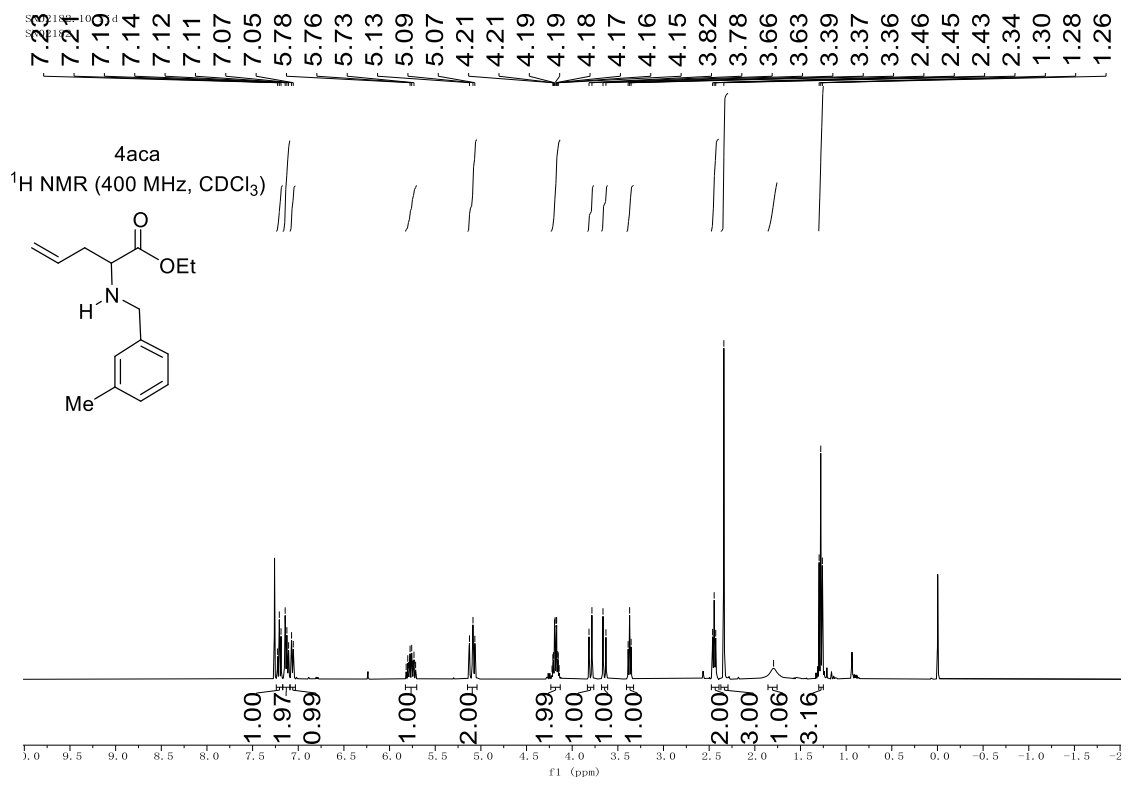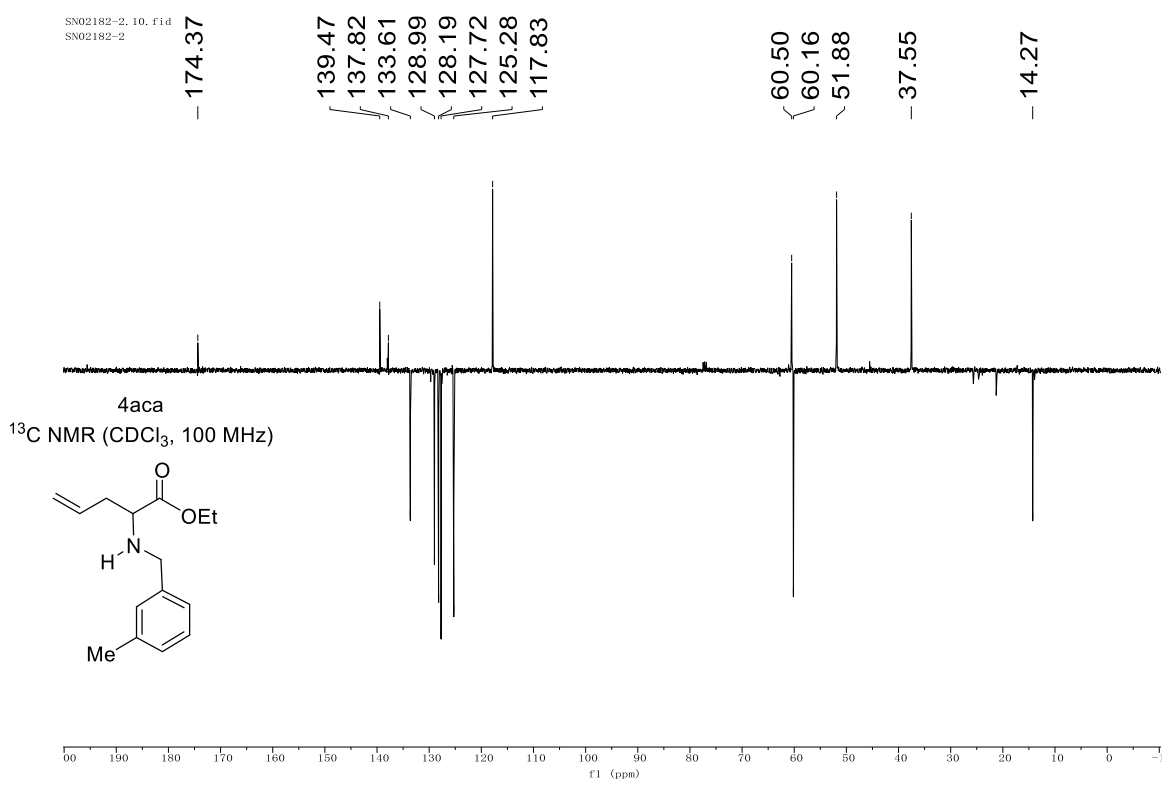

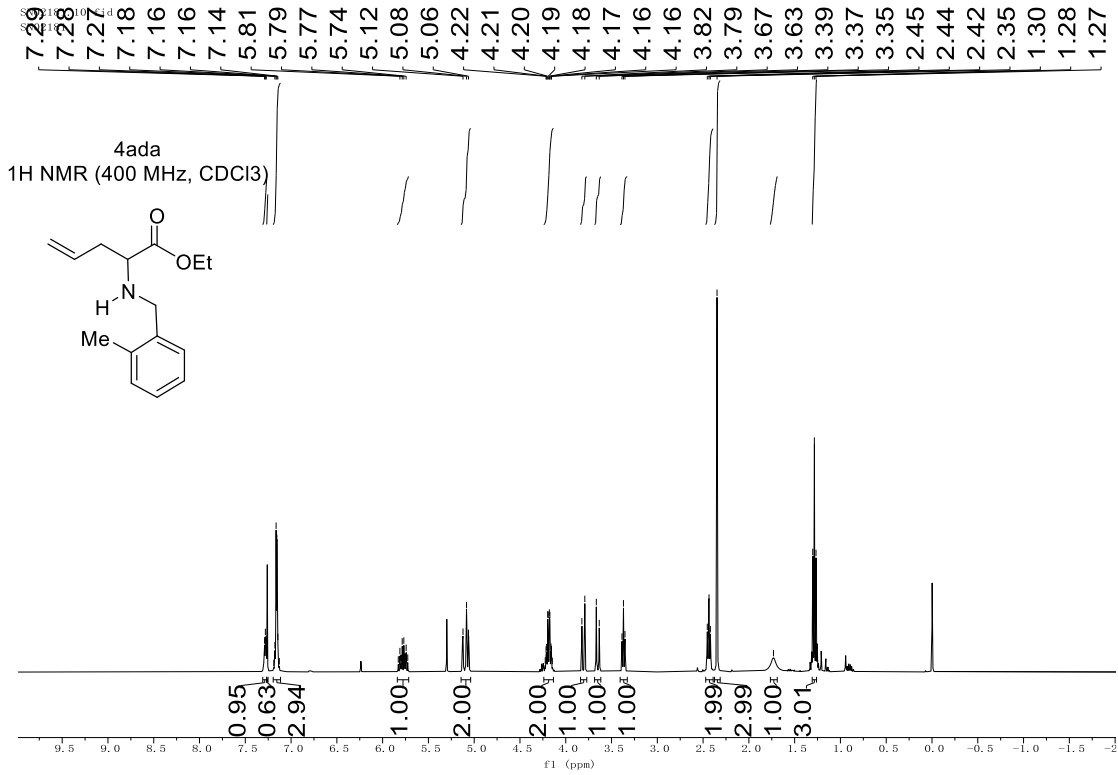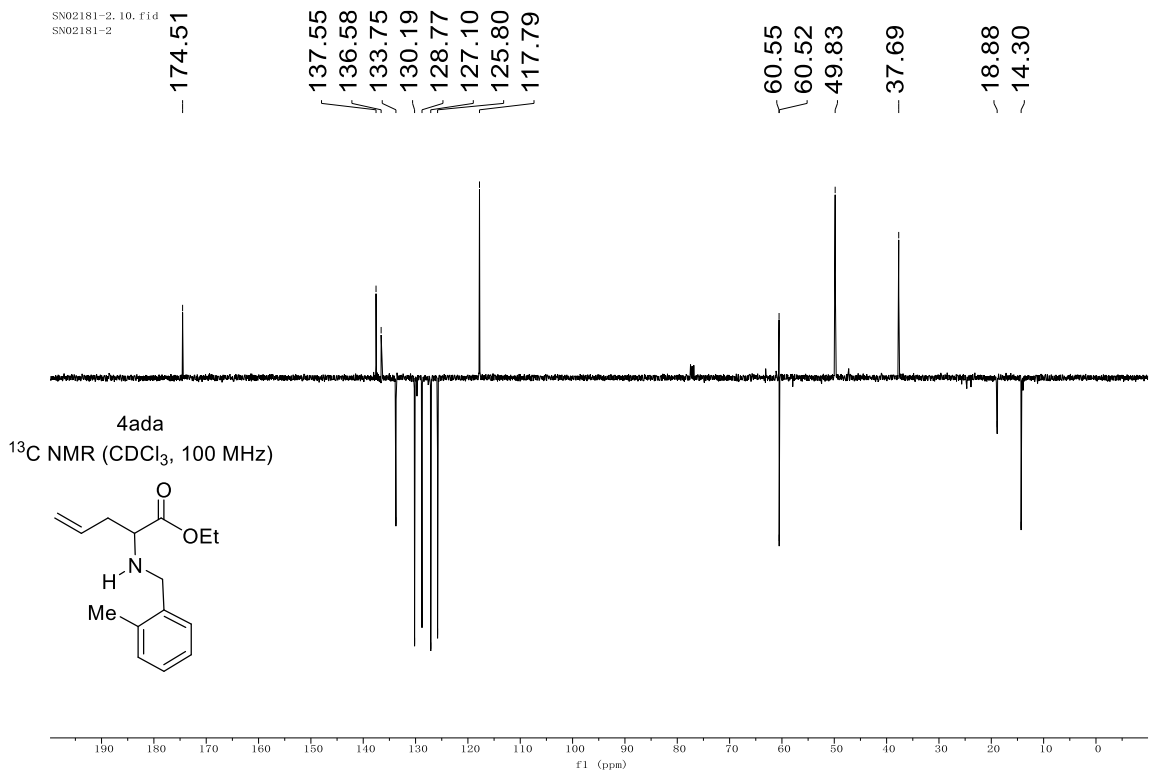



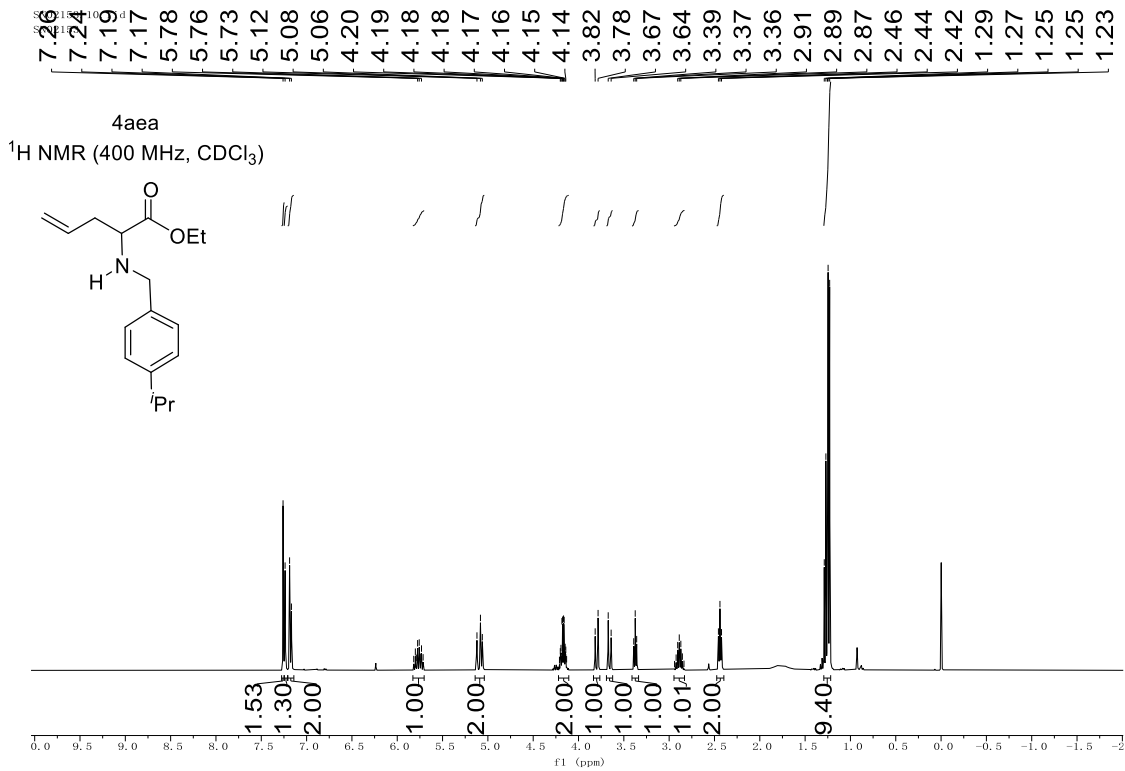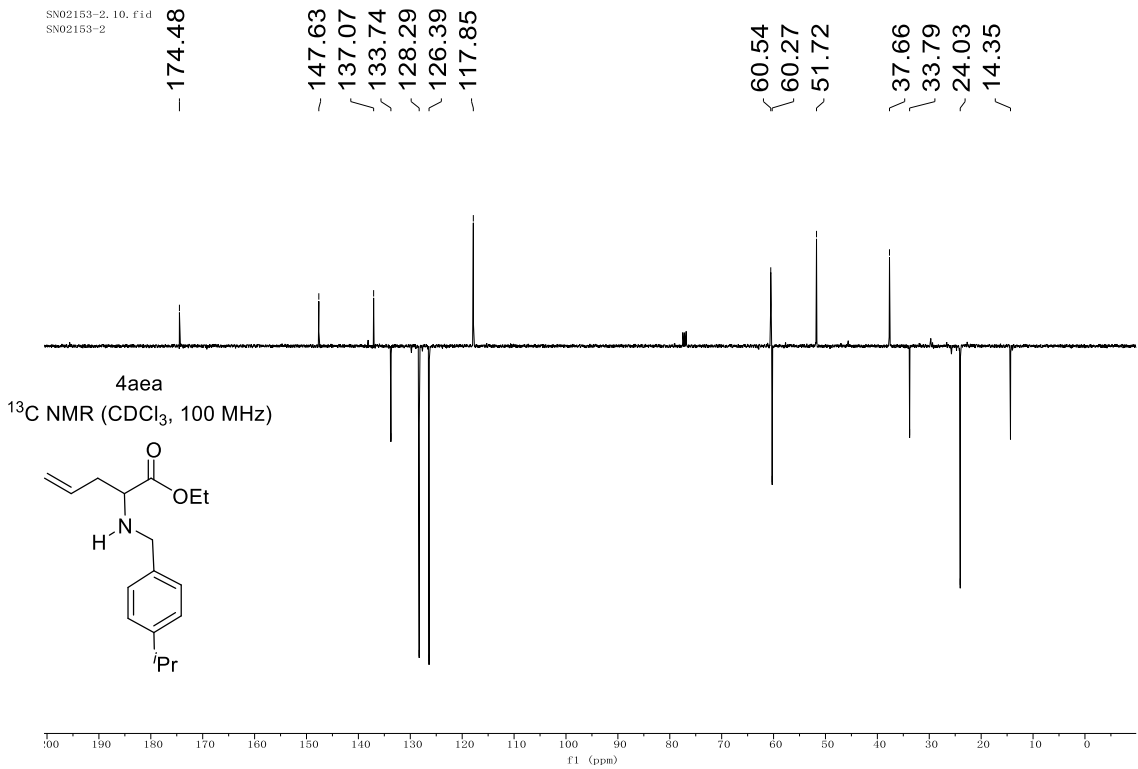

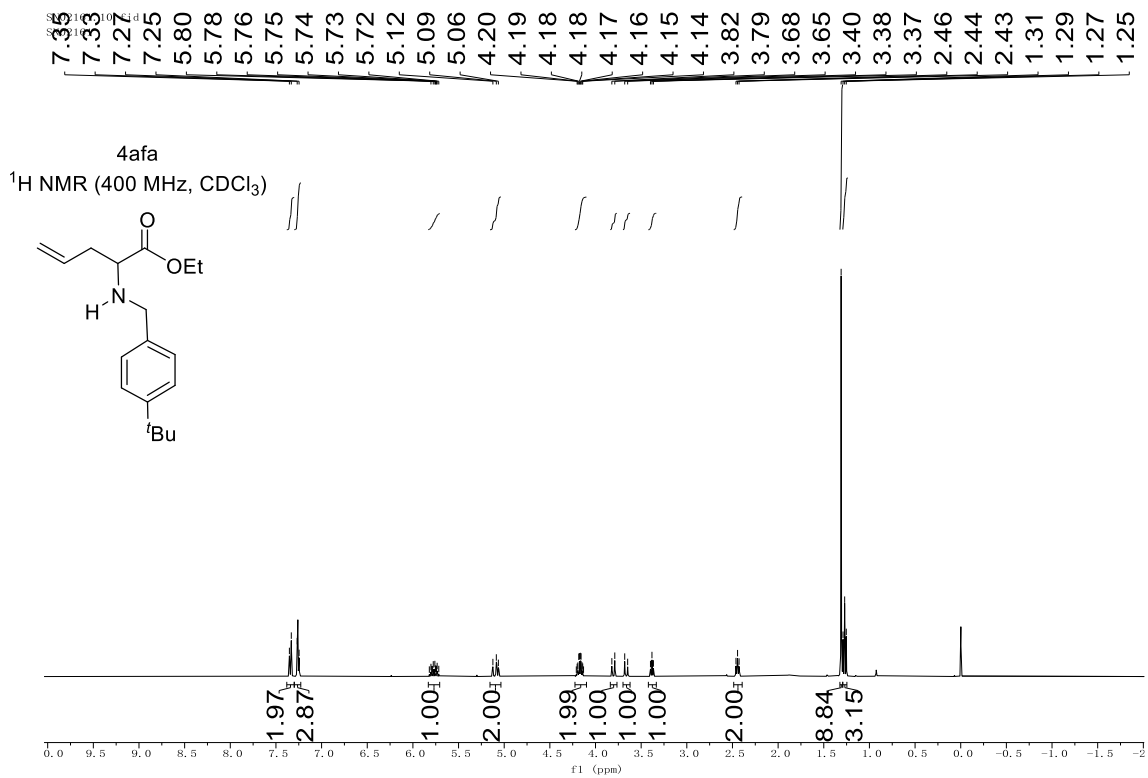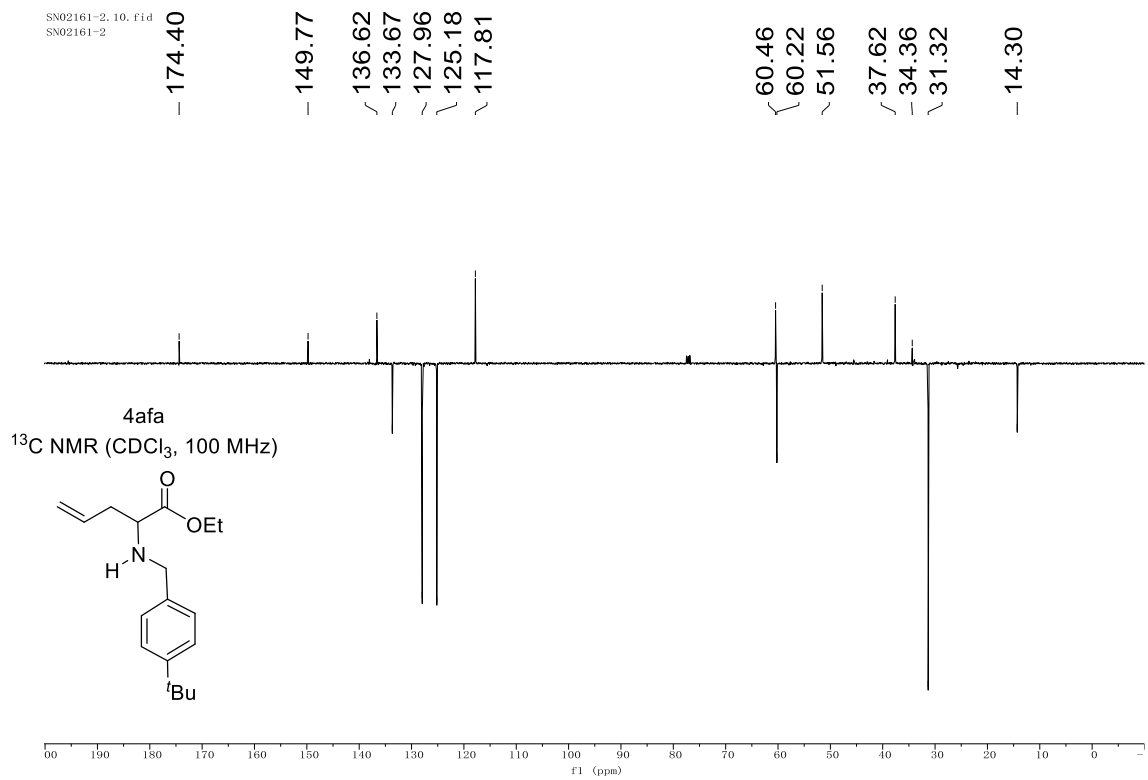

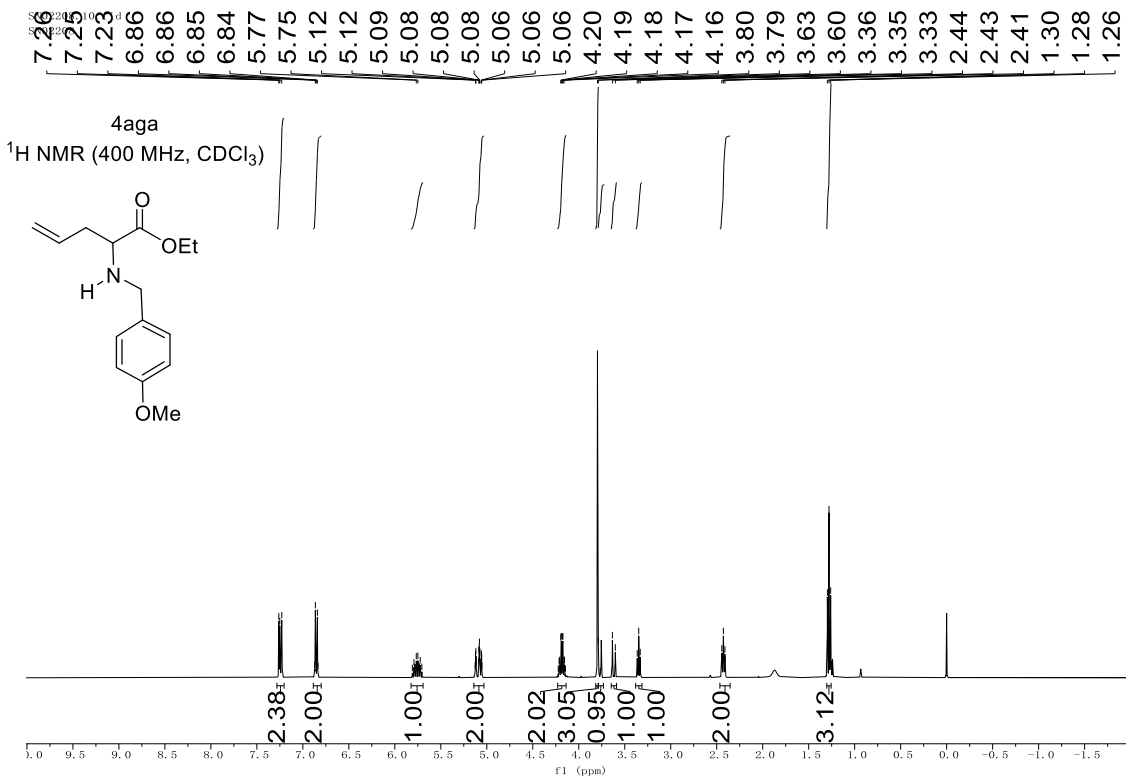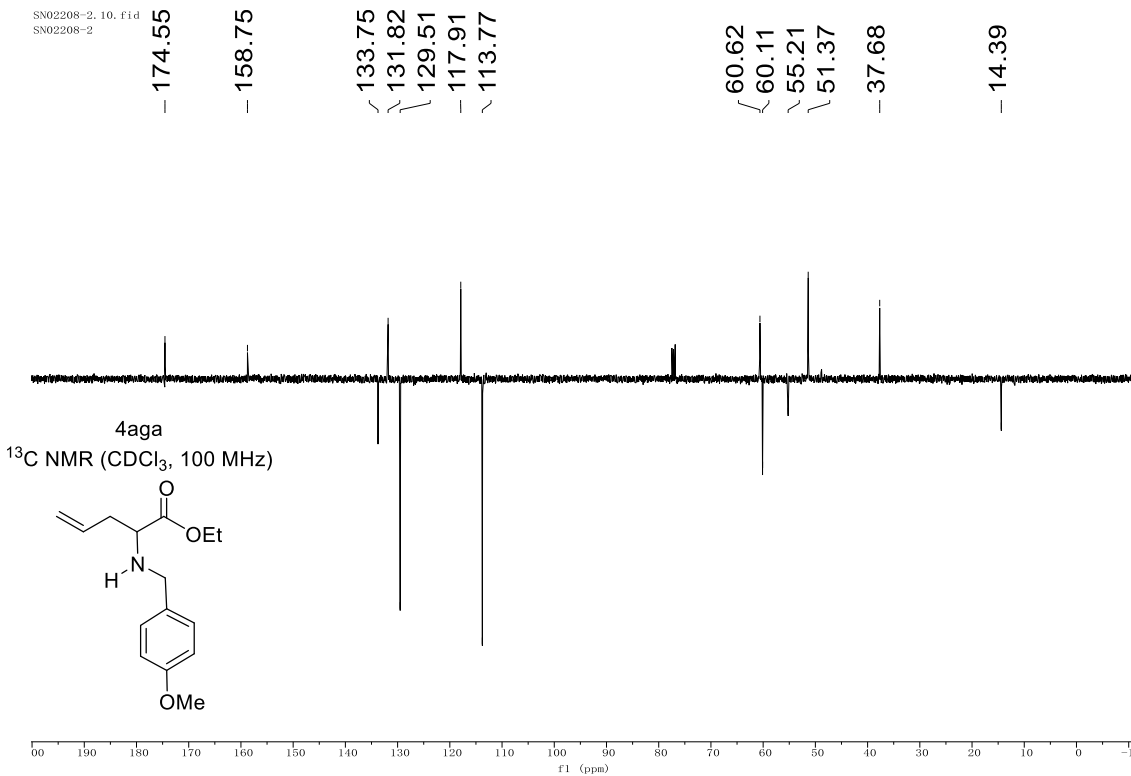

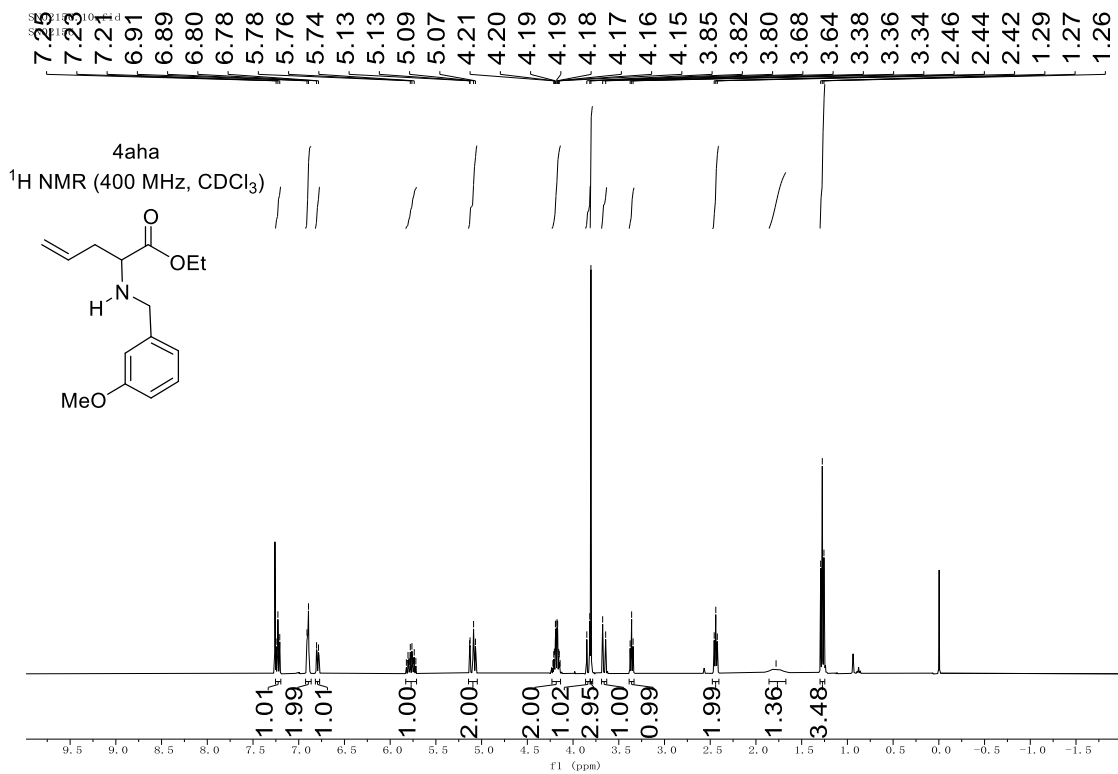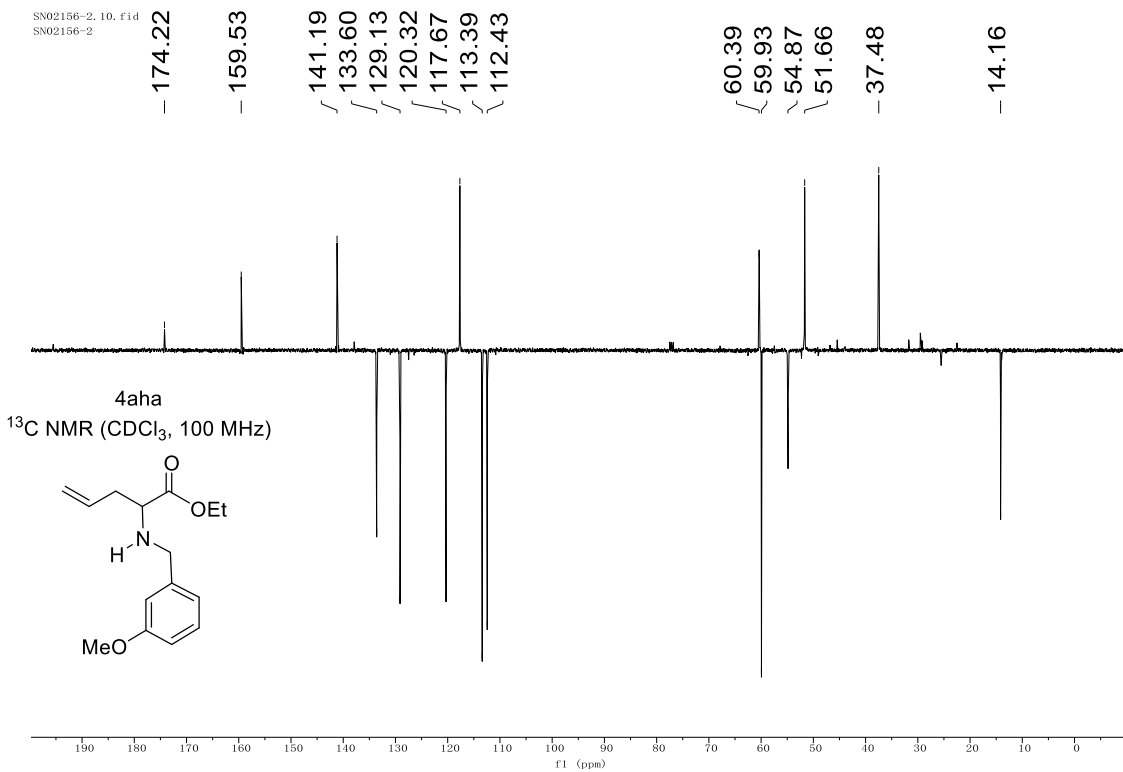

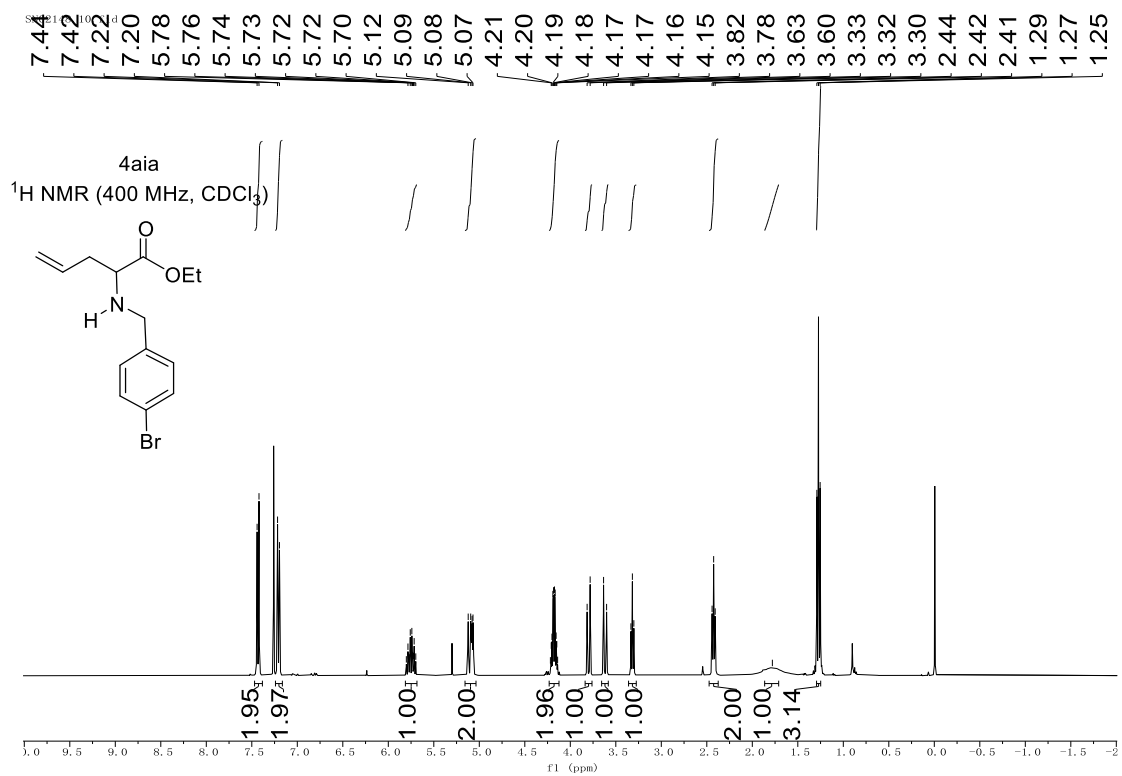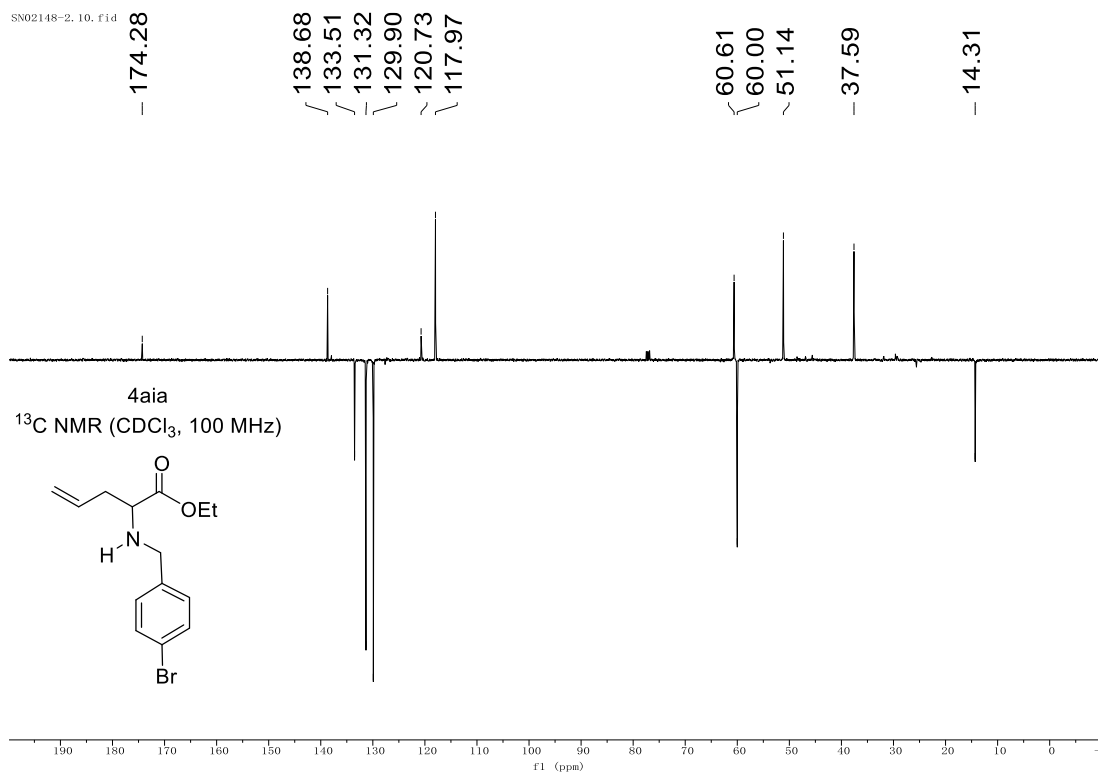

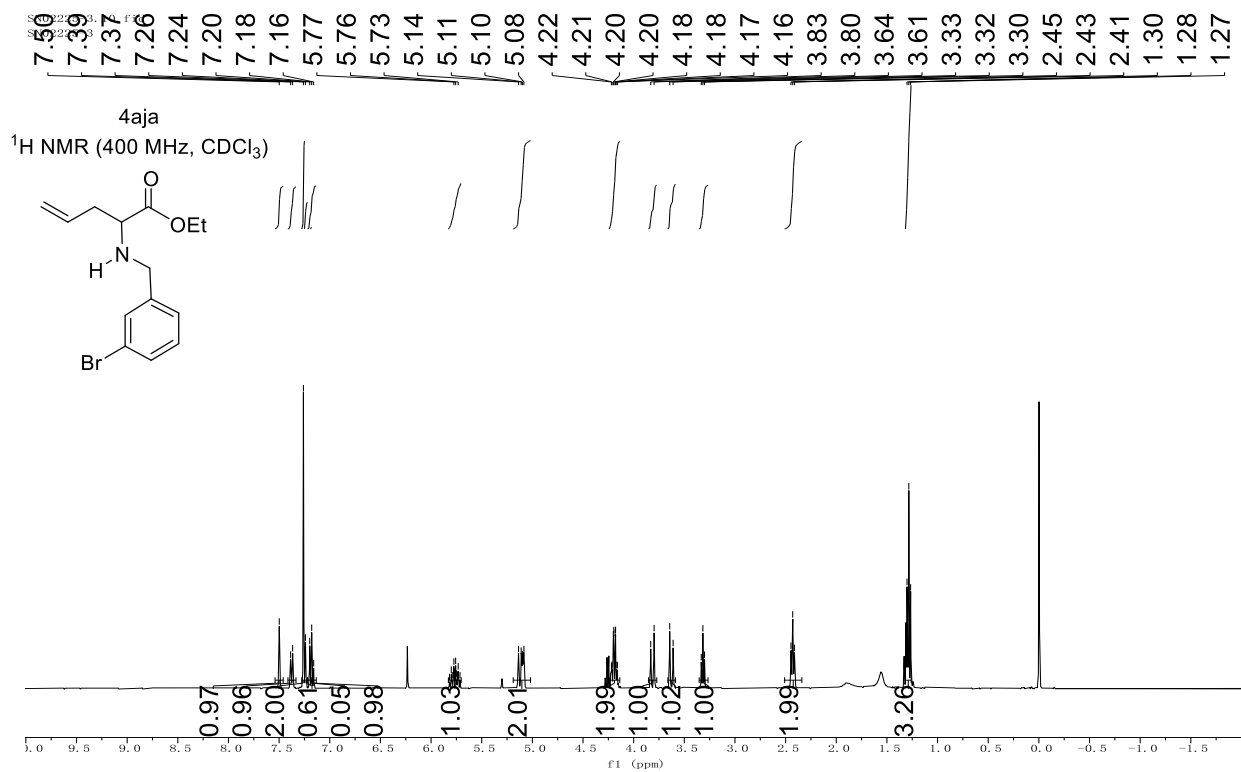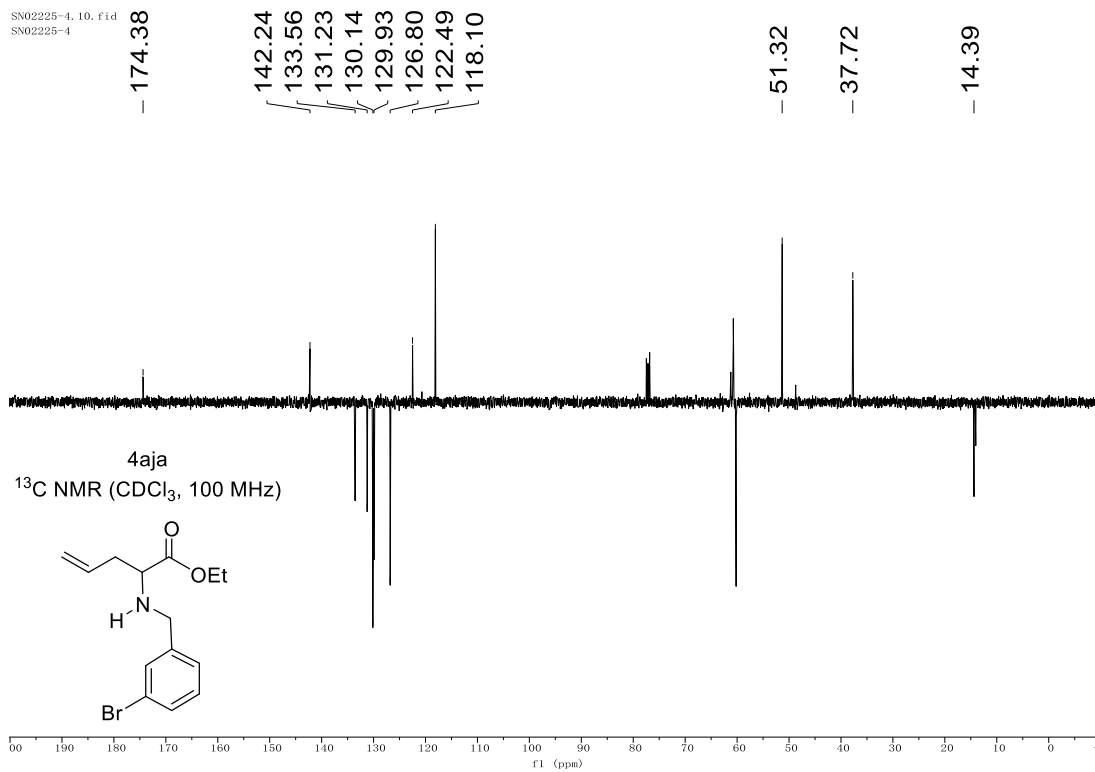

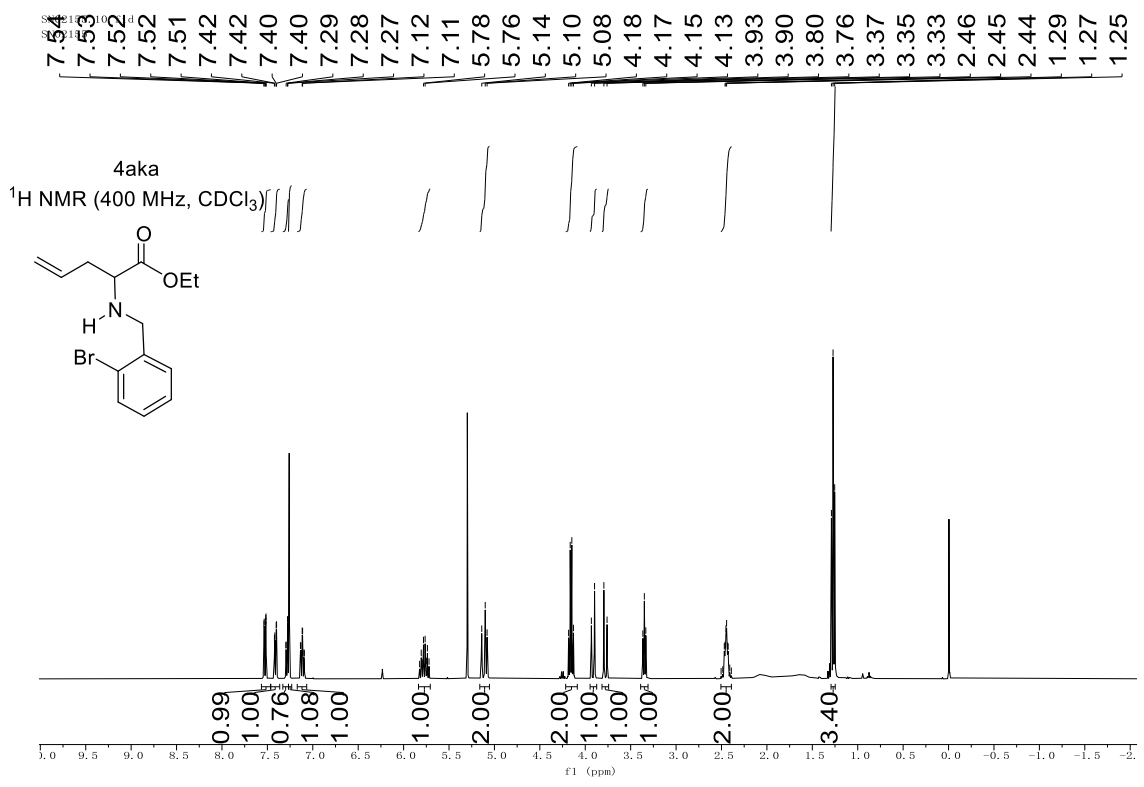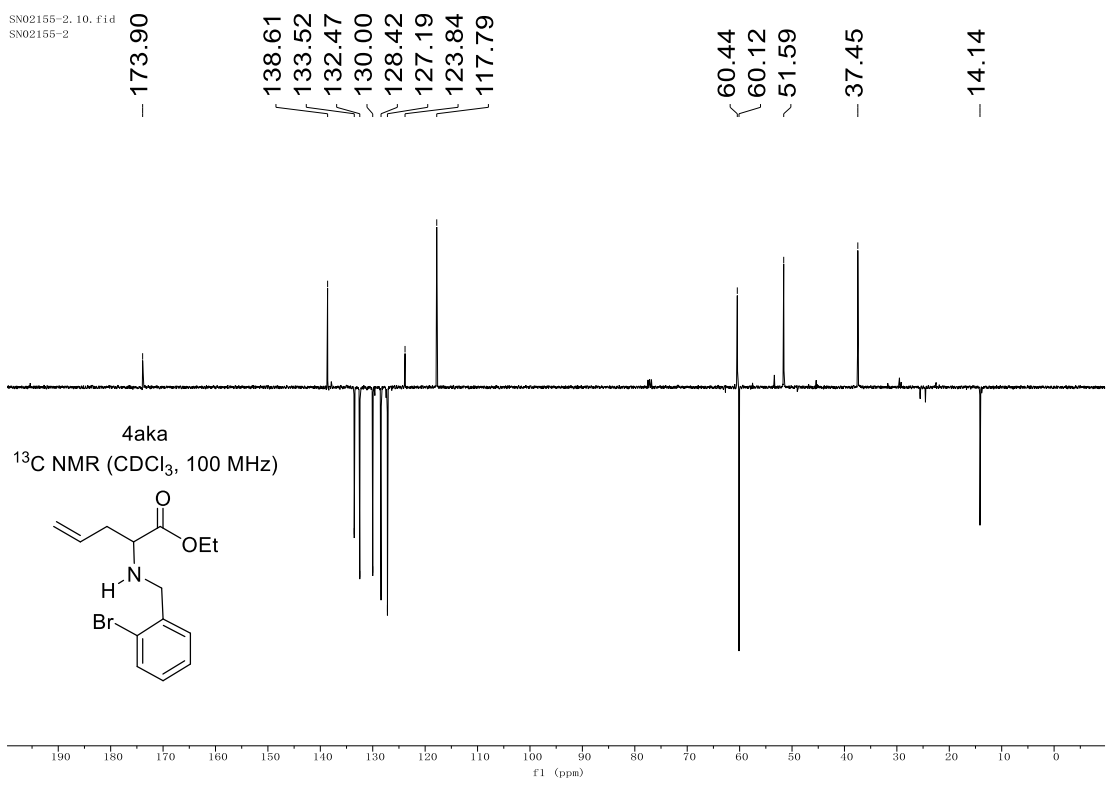

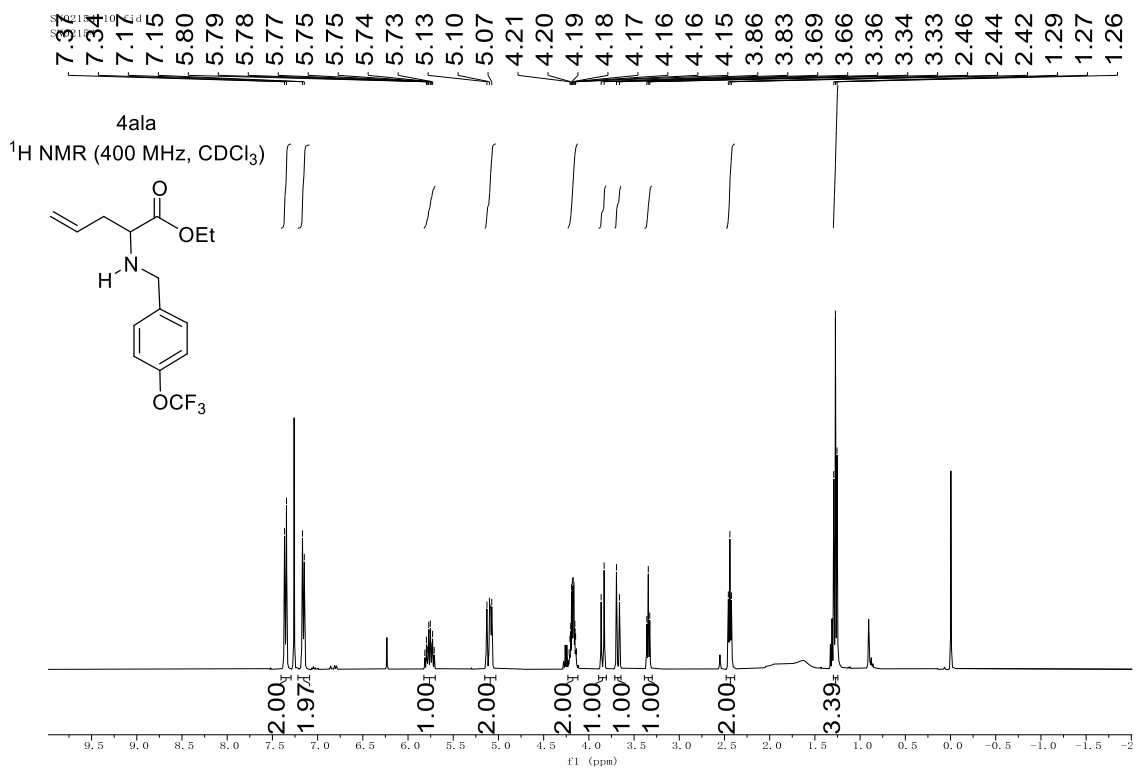

SN02154-2\_10\_fid  
 SN02154-2

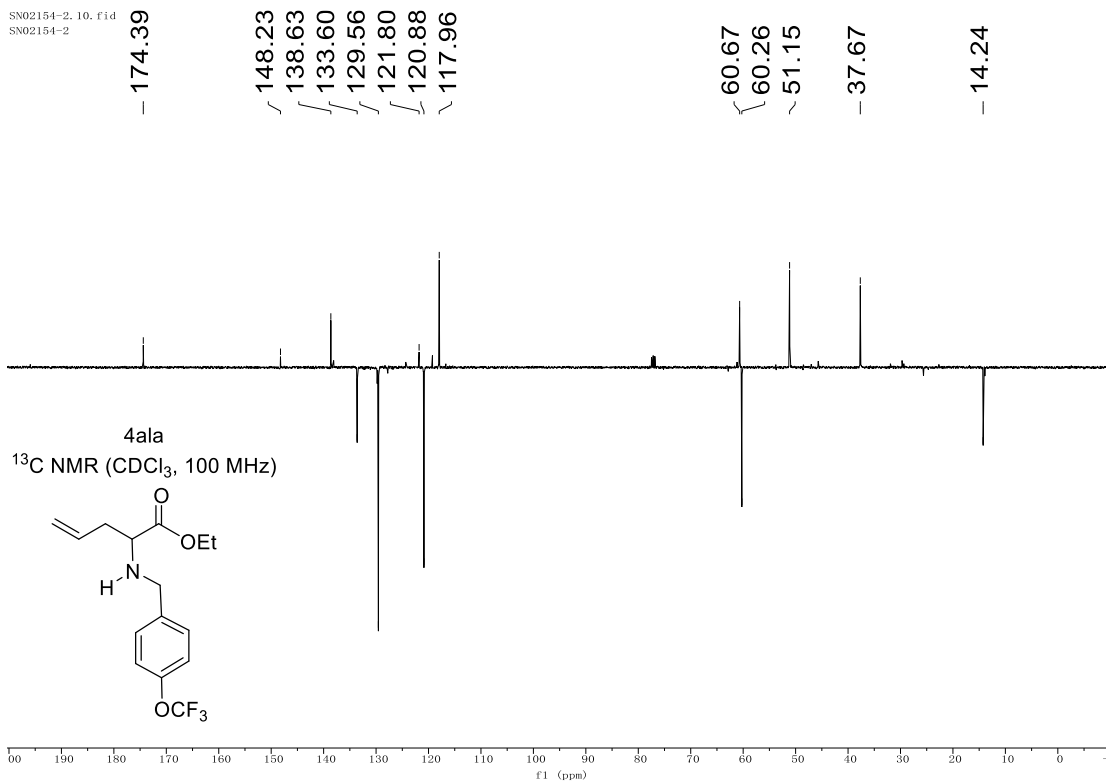



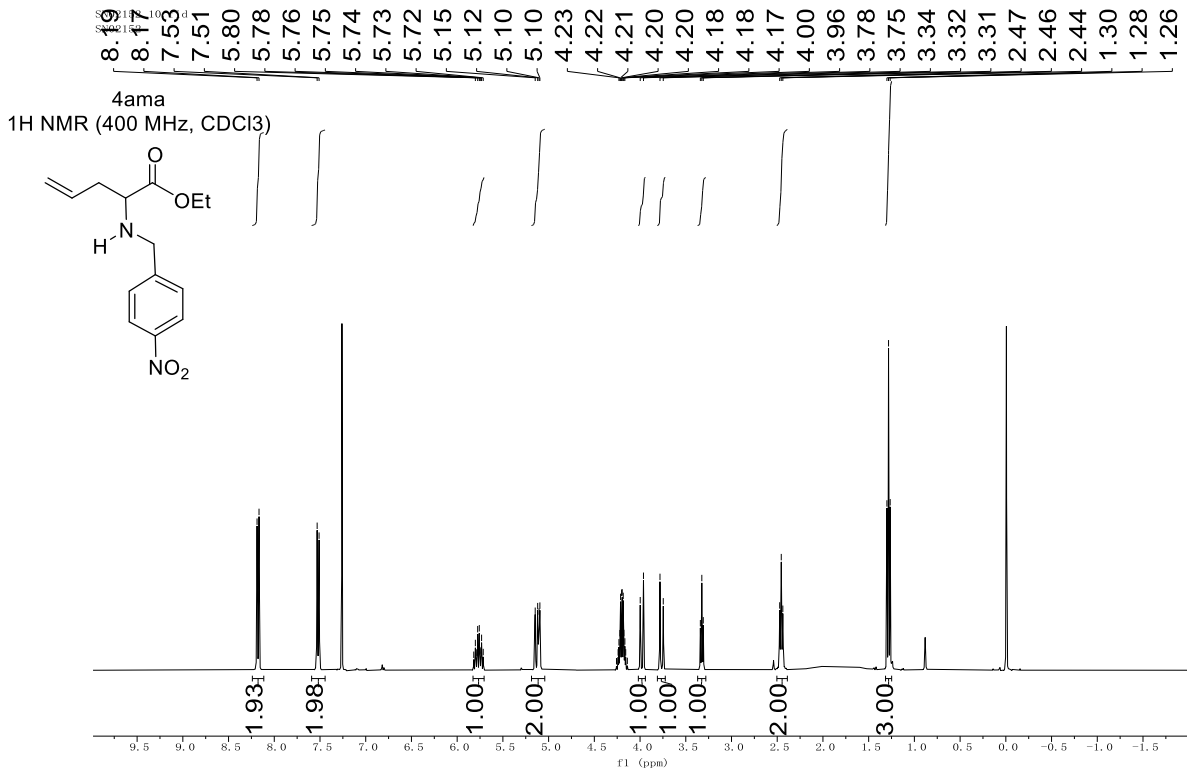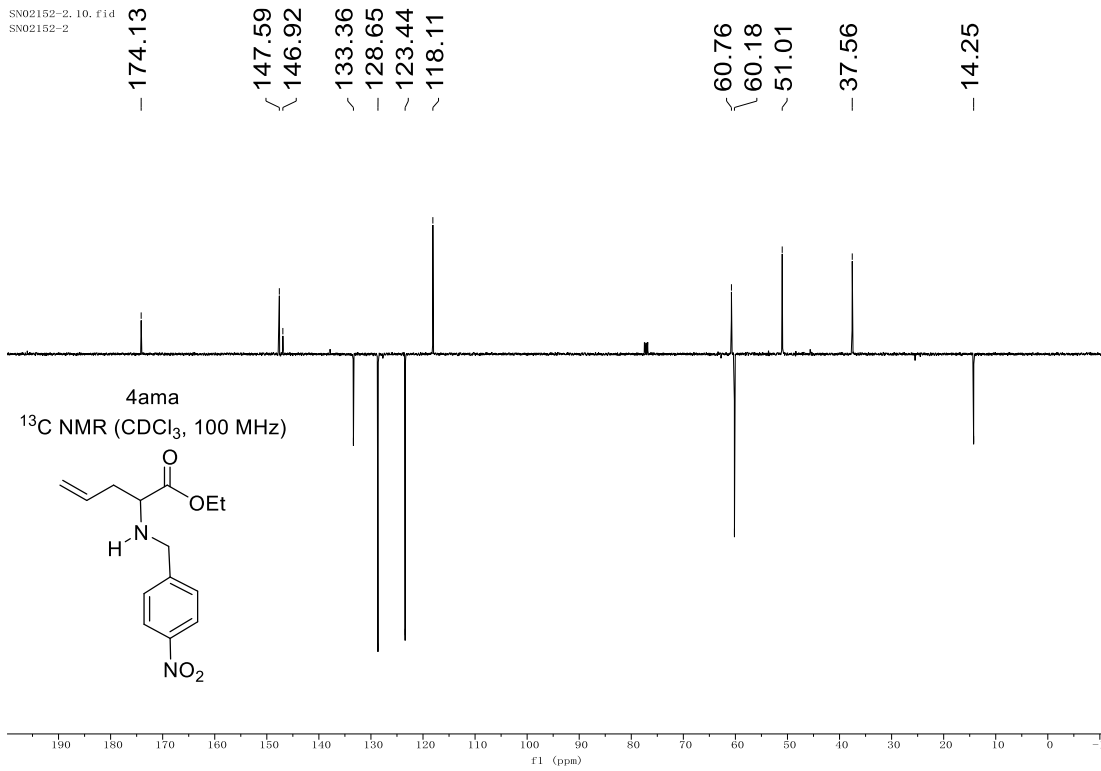

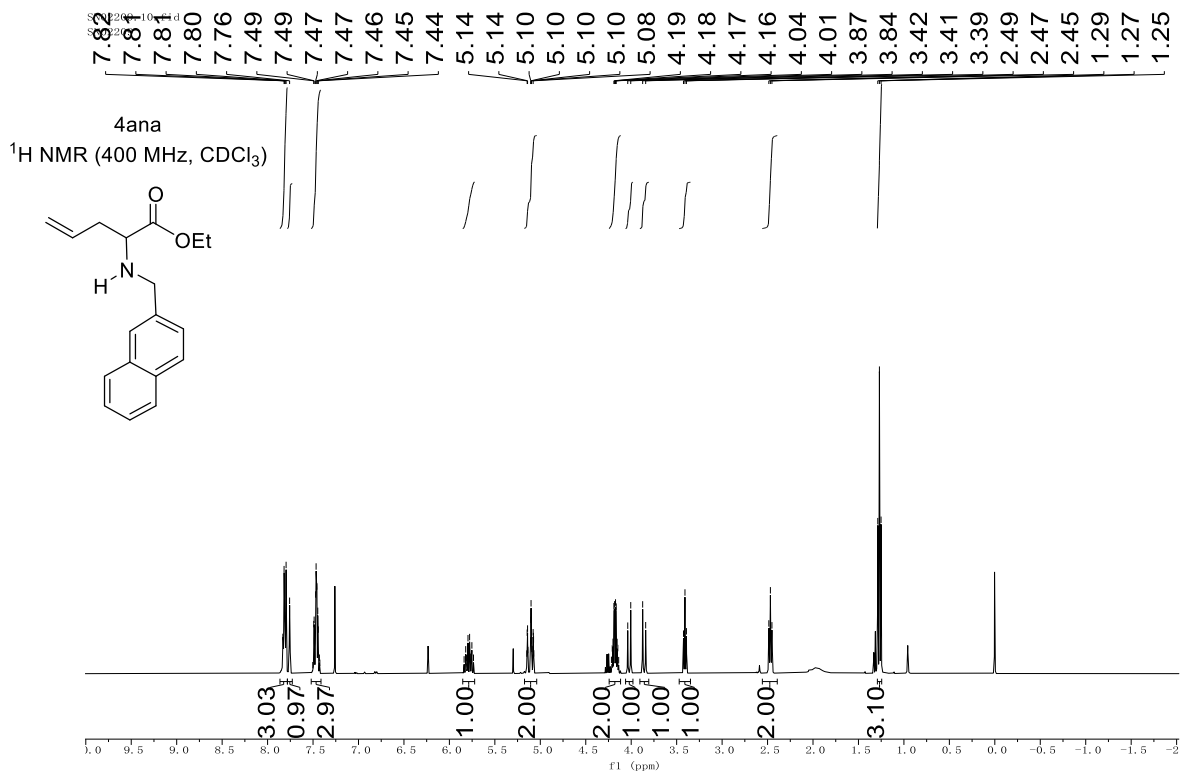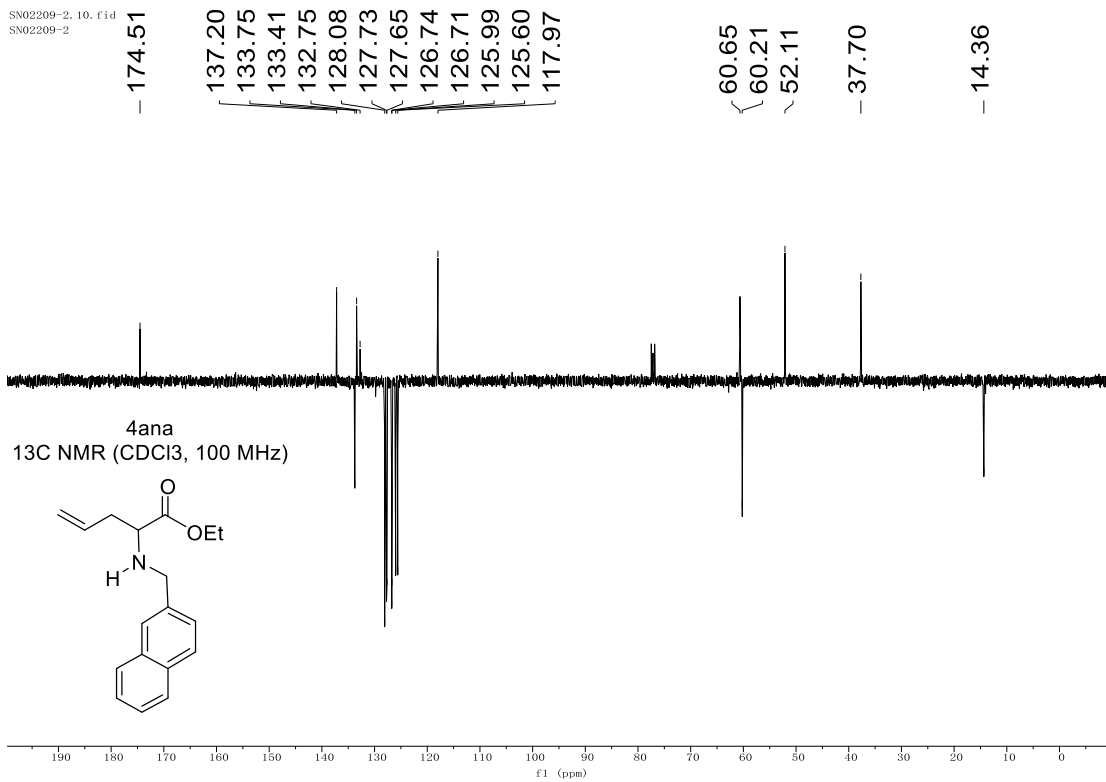

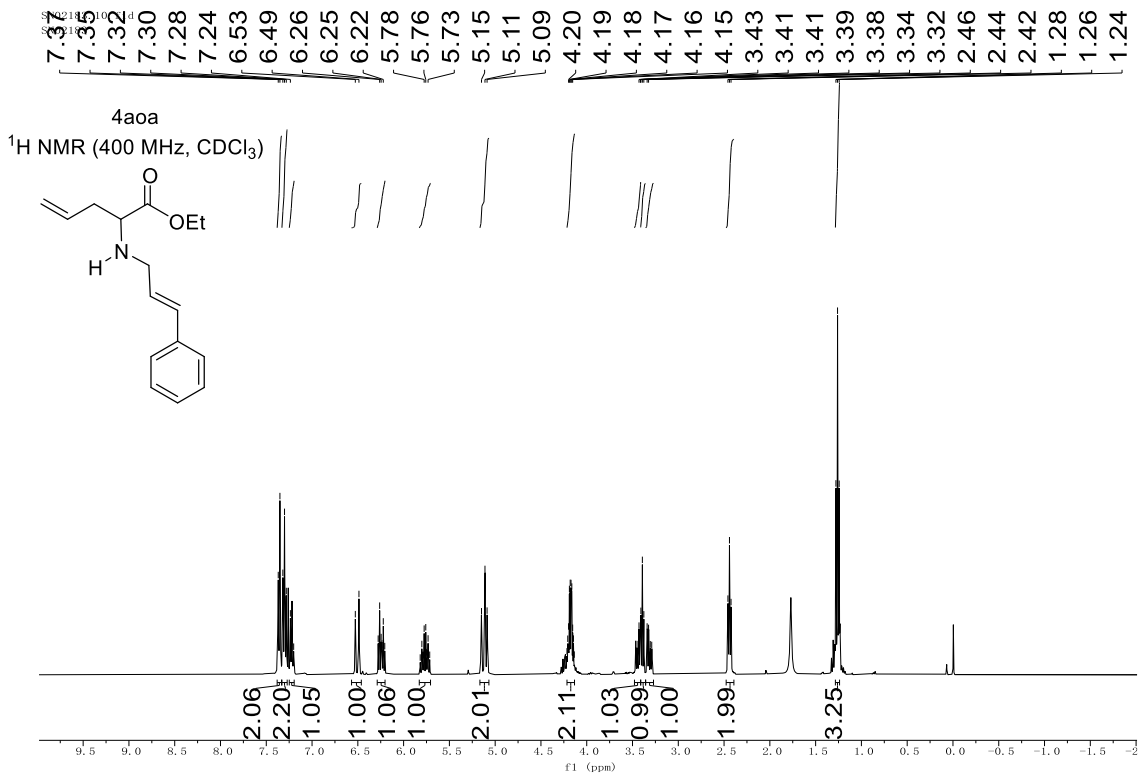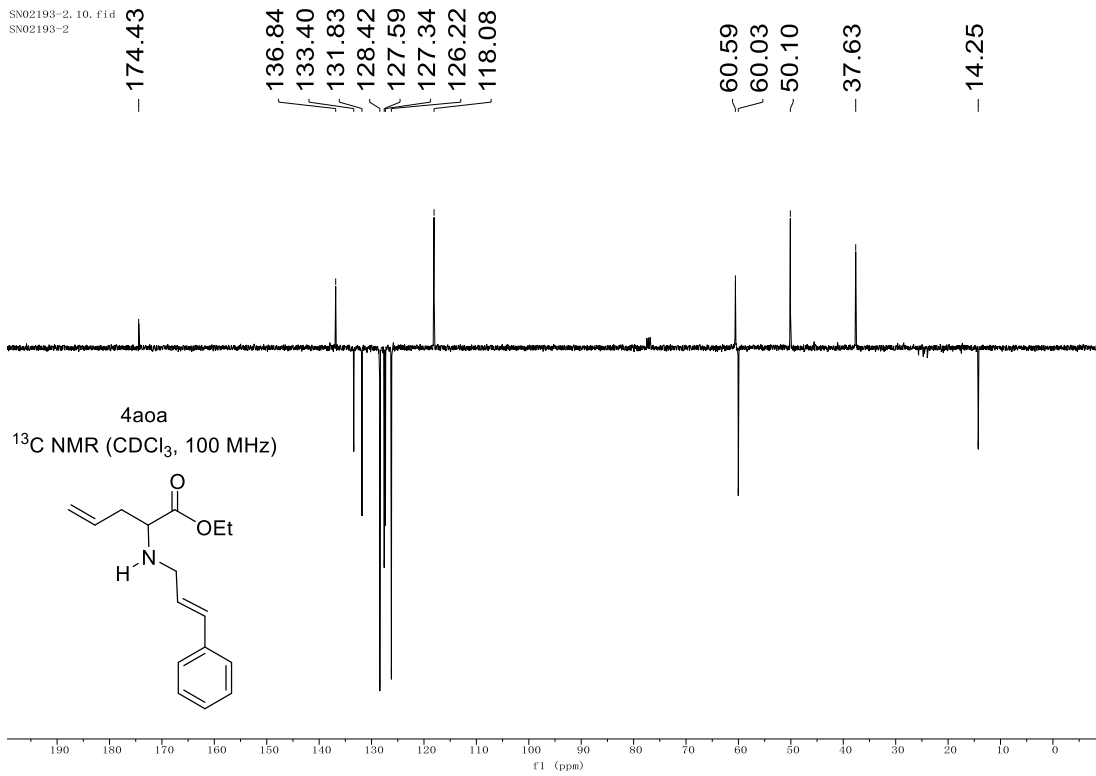

4apa  
<sup>1</sup>H NMR (400 MHz, CDCl<sub>3</sub>)

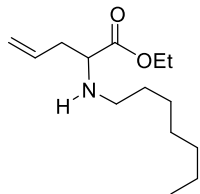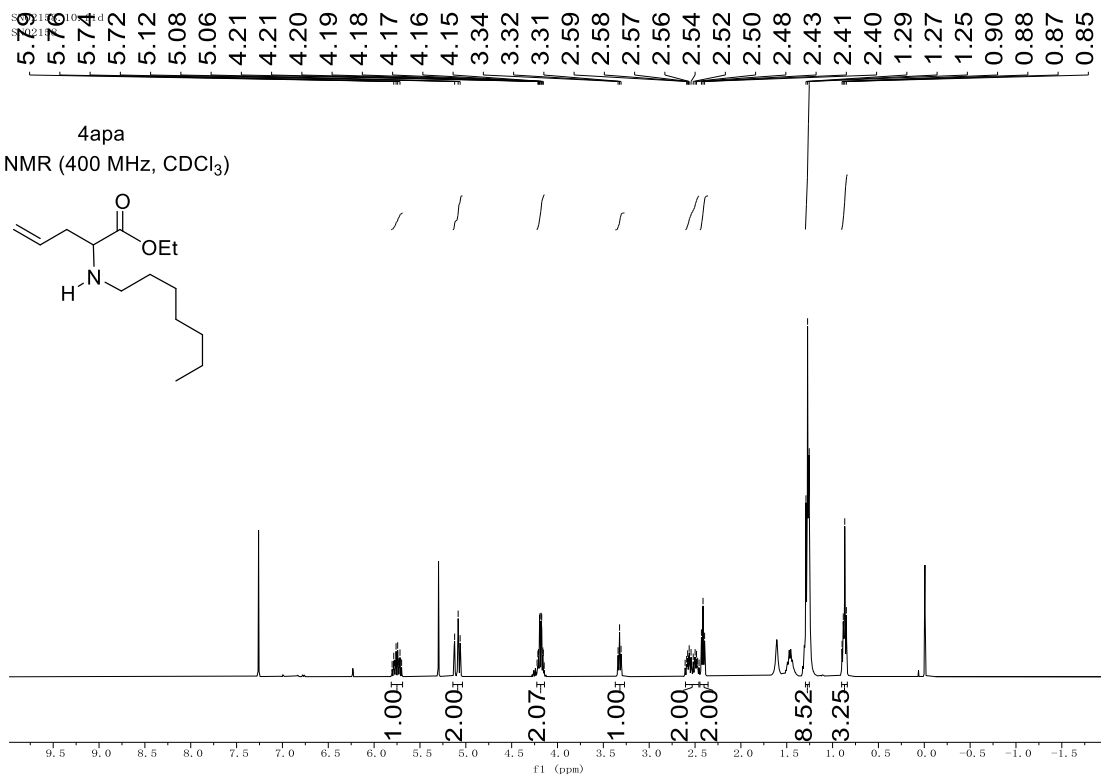

SN02158-2\_10.fid  
 SN02158-2

- 174.38  
 - 133.52  
 - 117.56  
 60.95  
 60.24  
 47.96  
 37.52  
 31.60  
 29.89  
 28.96  
 27.00  
 22.39  
 14.11  
 13.83

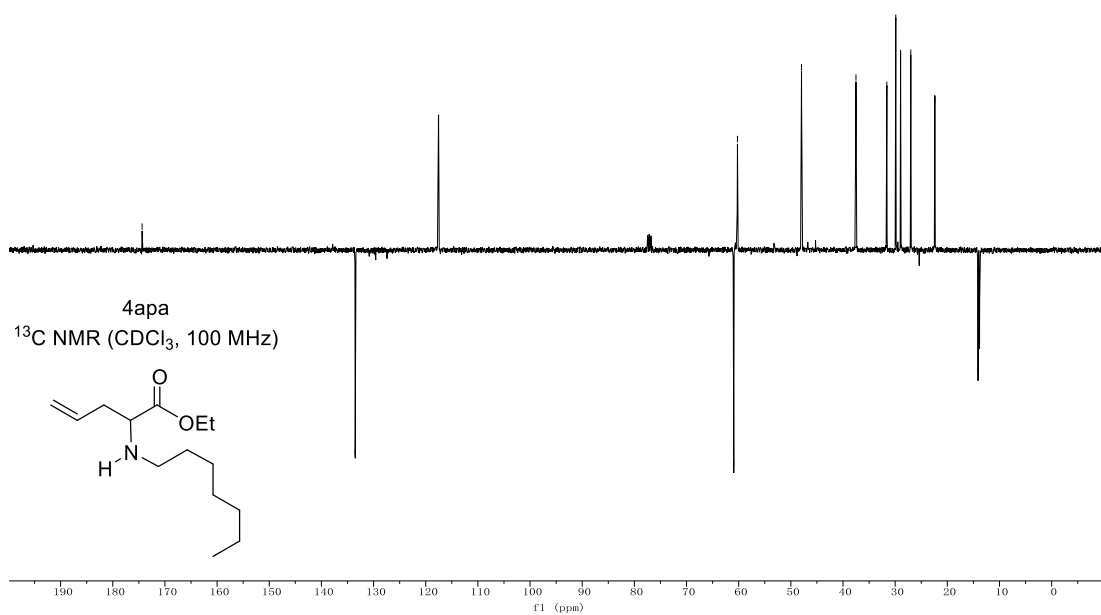

4apa  
<sup>13</sup>C NMR (CDCl<sub>3</sub>, 100 MHz)

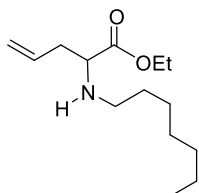

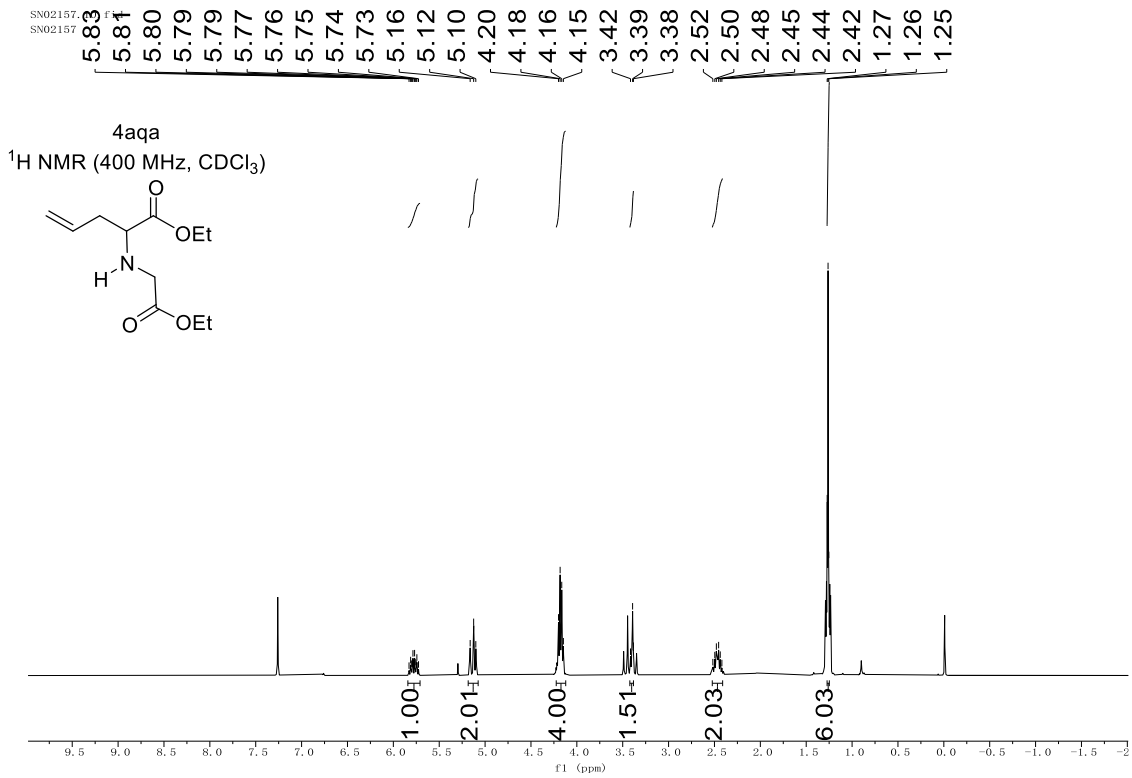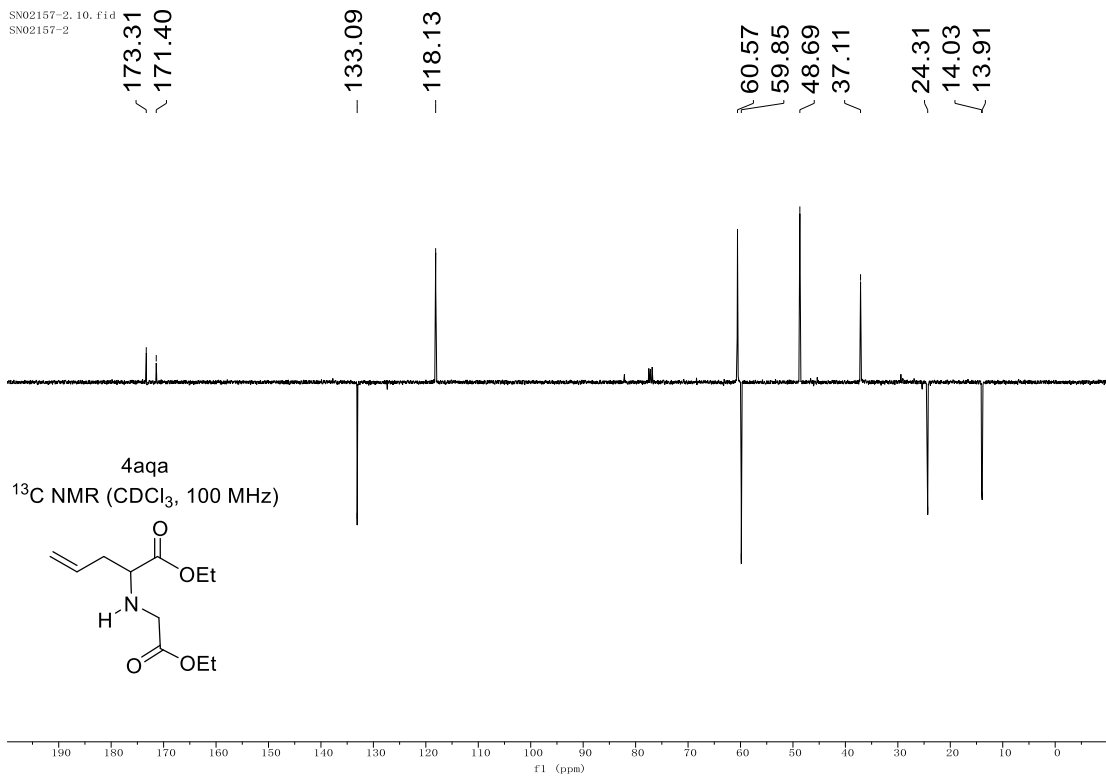

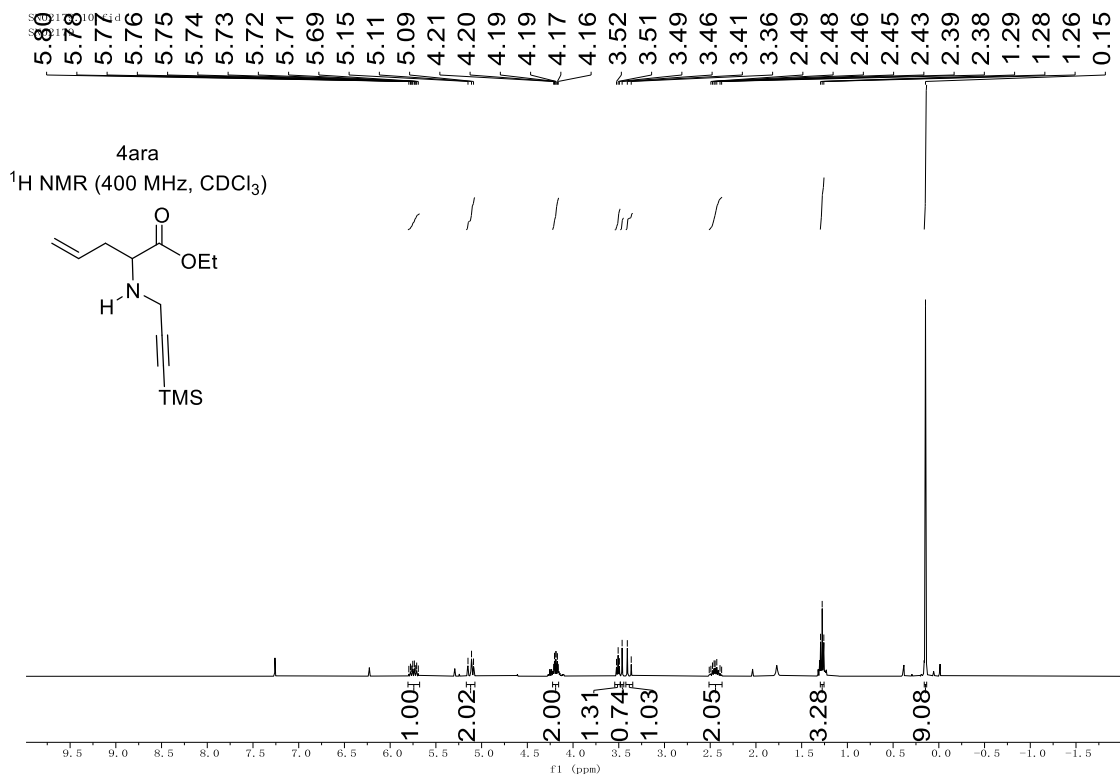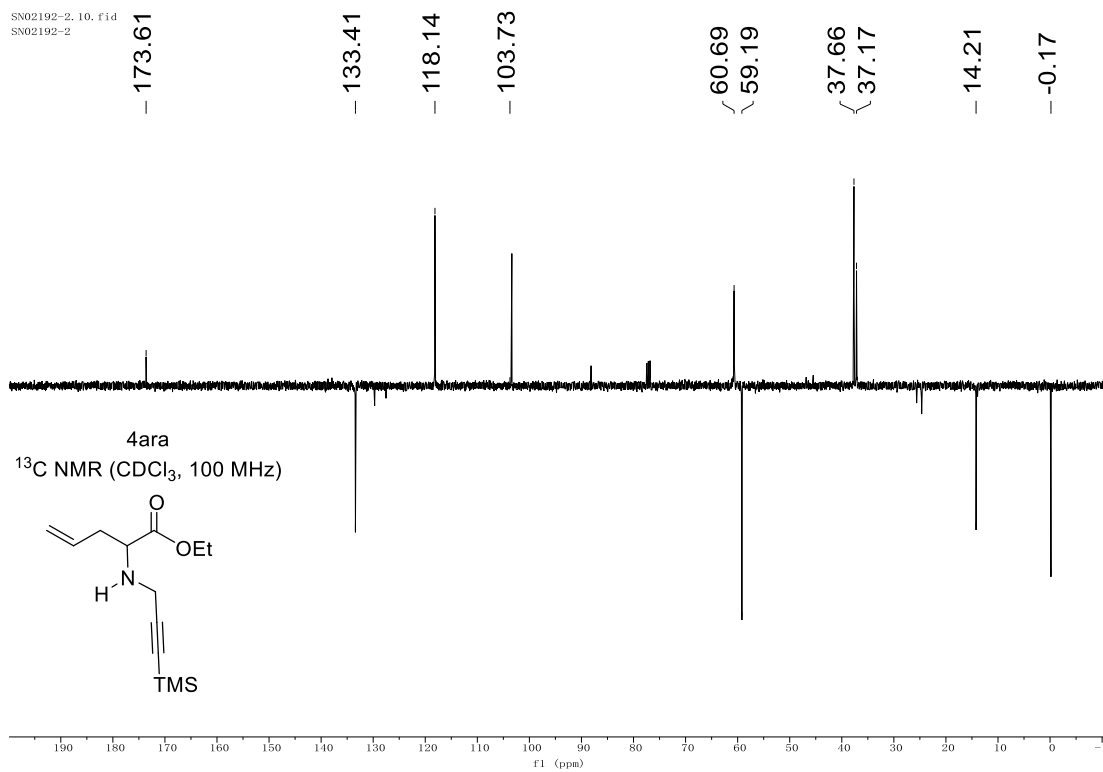

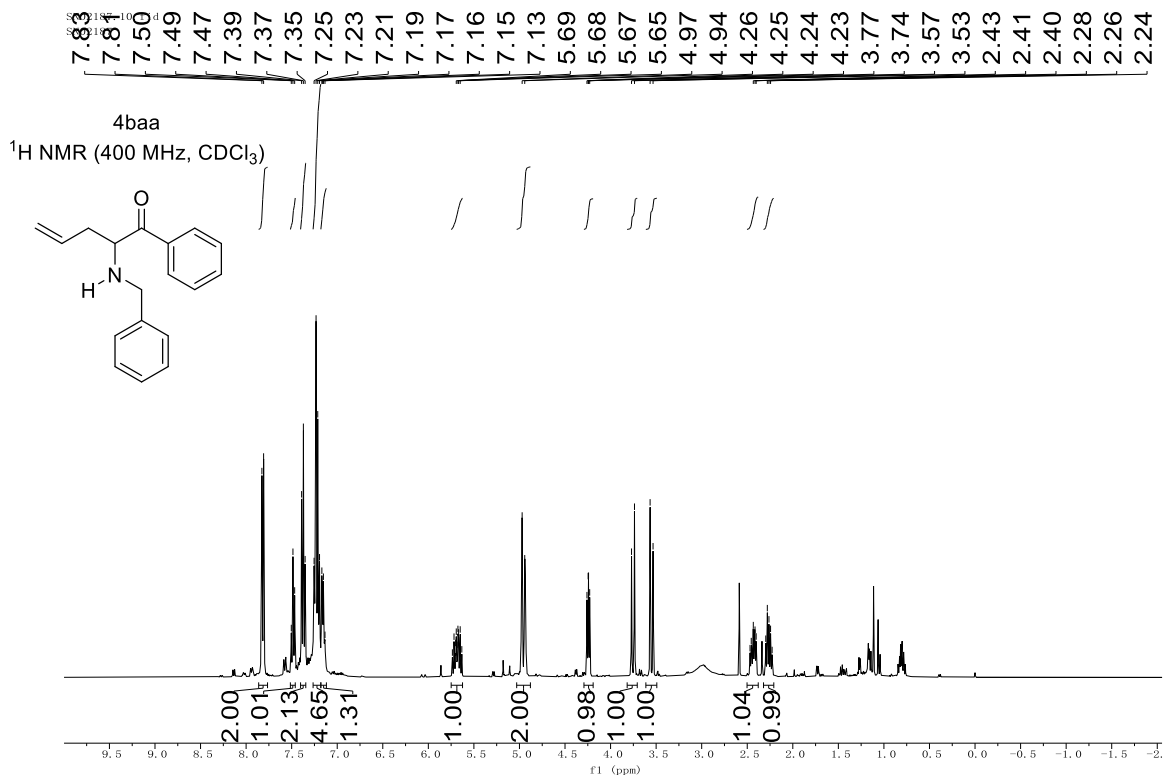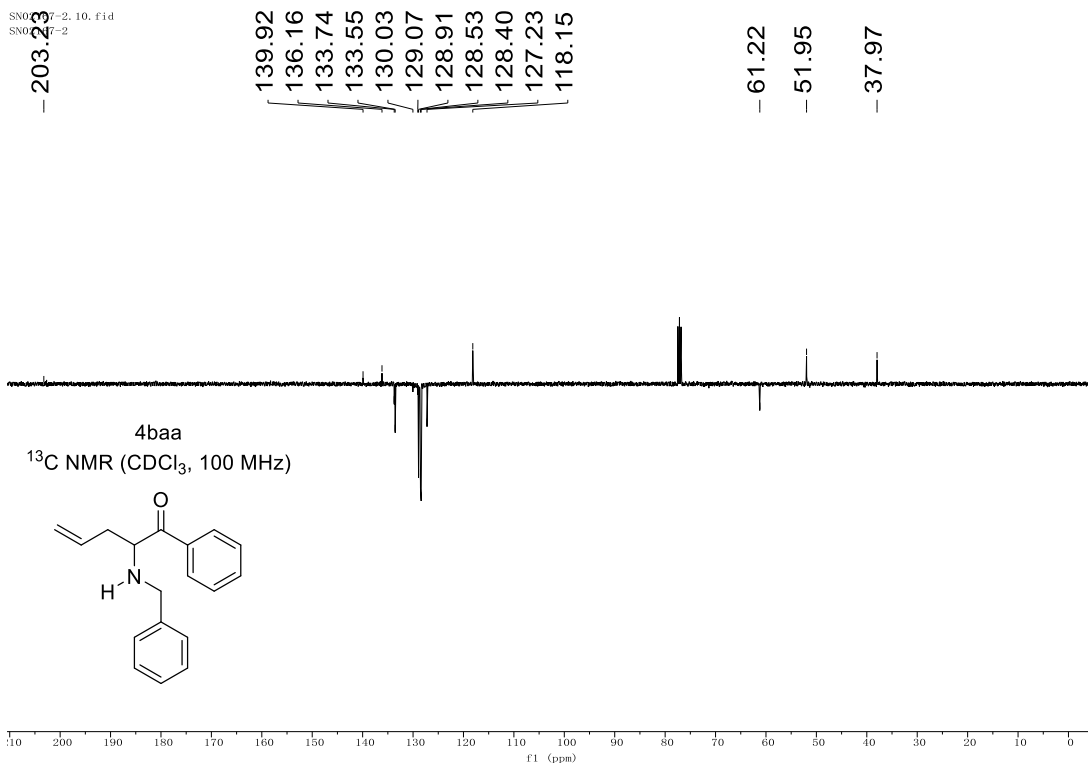

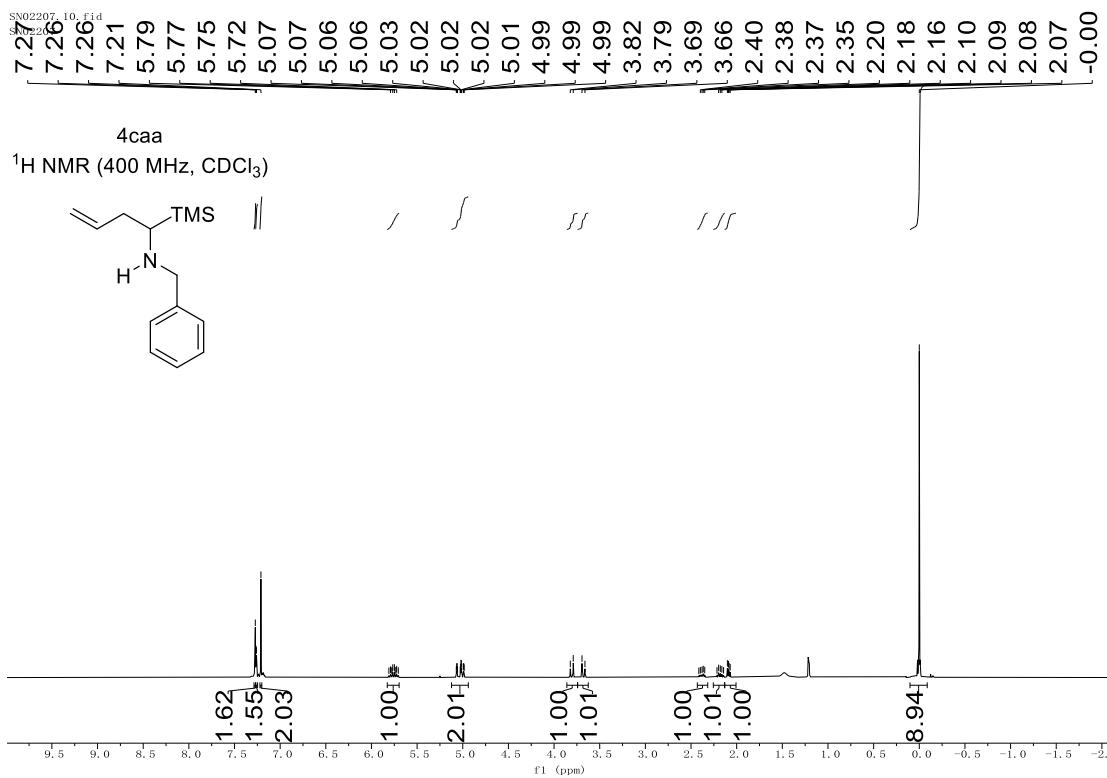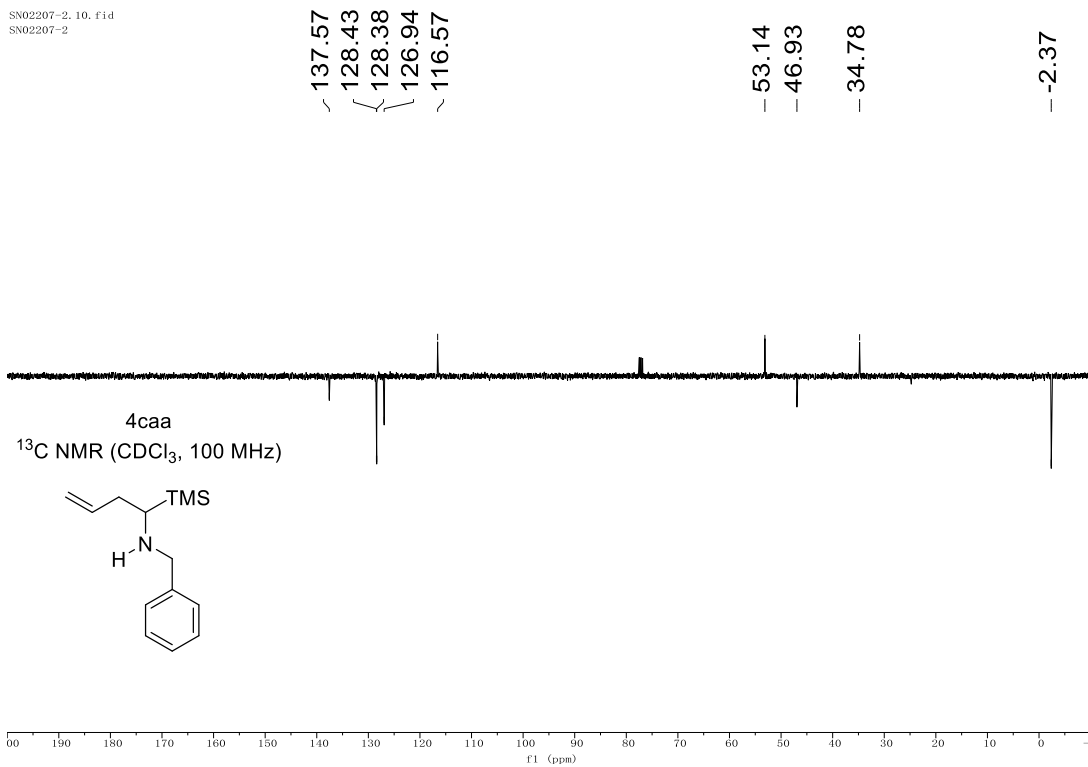



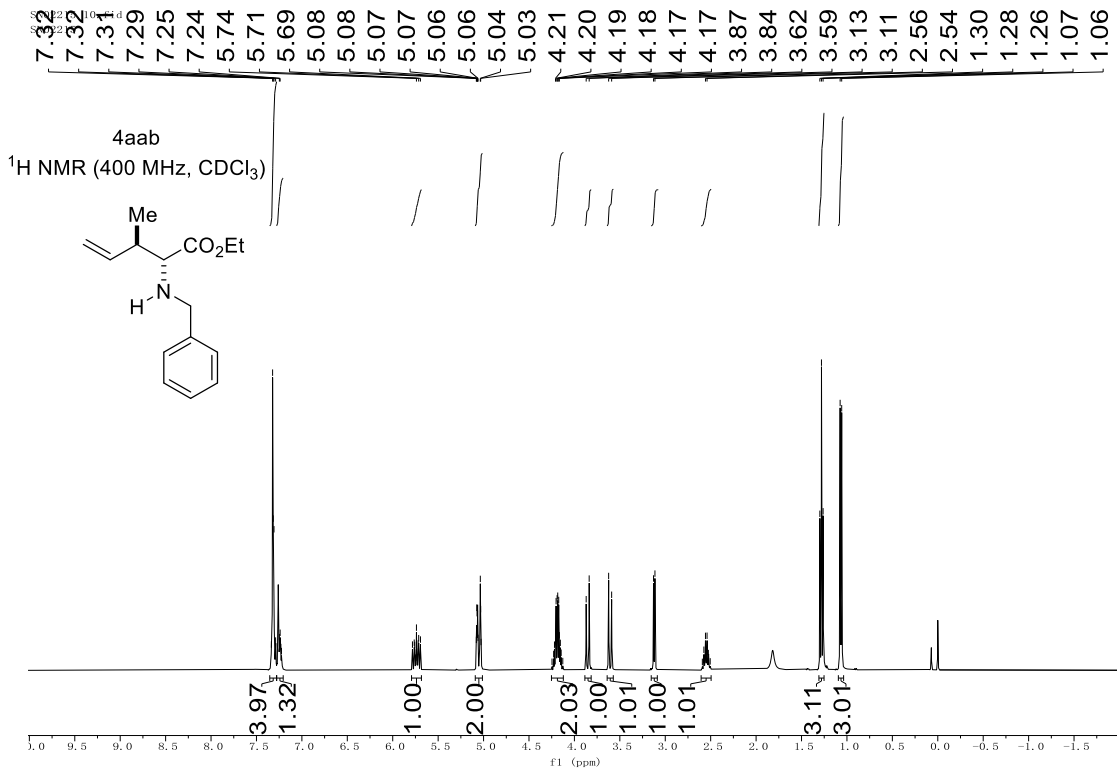

SN02216-2.10.fid  
 SN02216-2

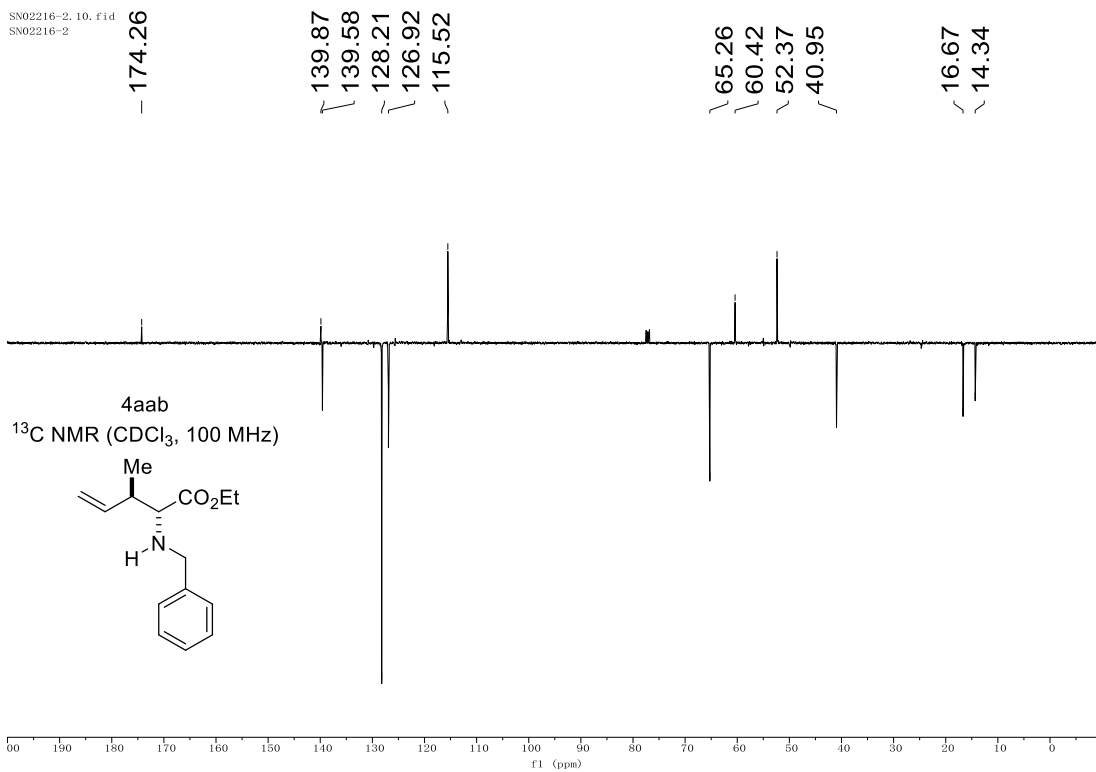

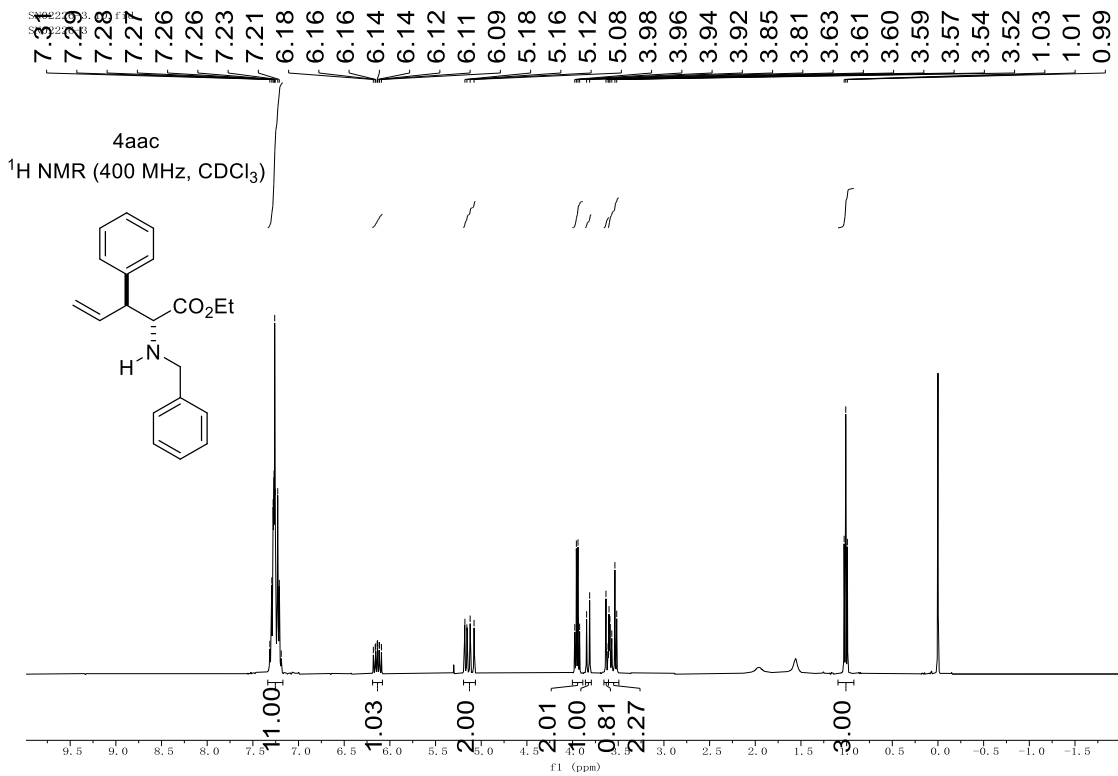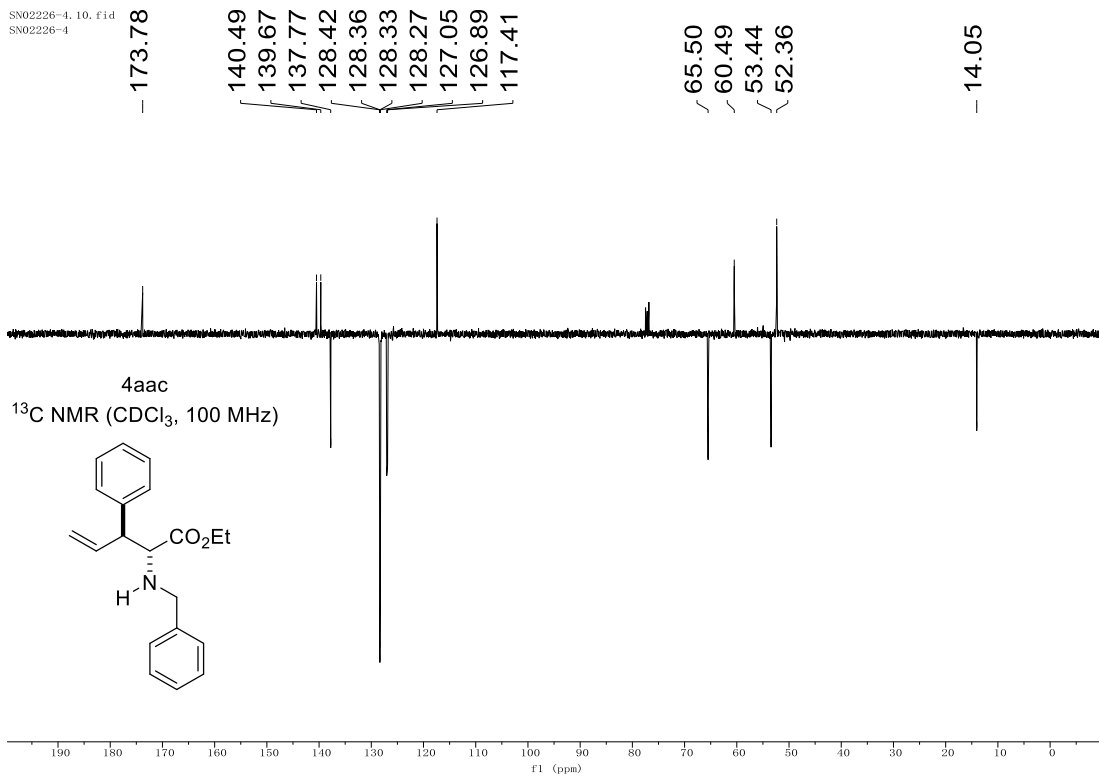

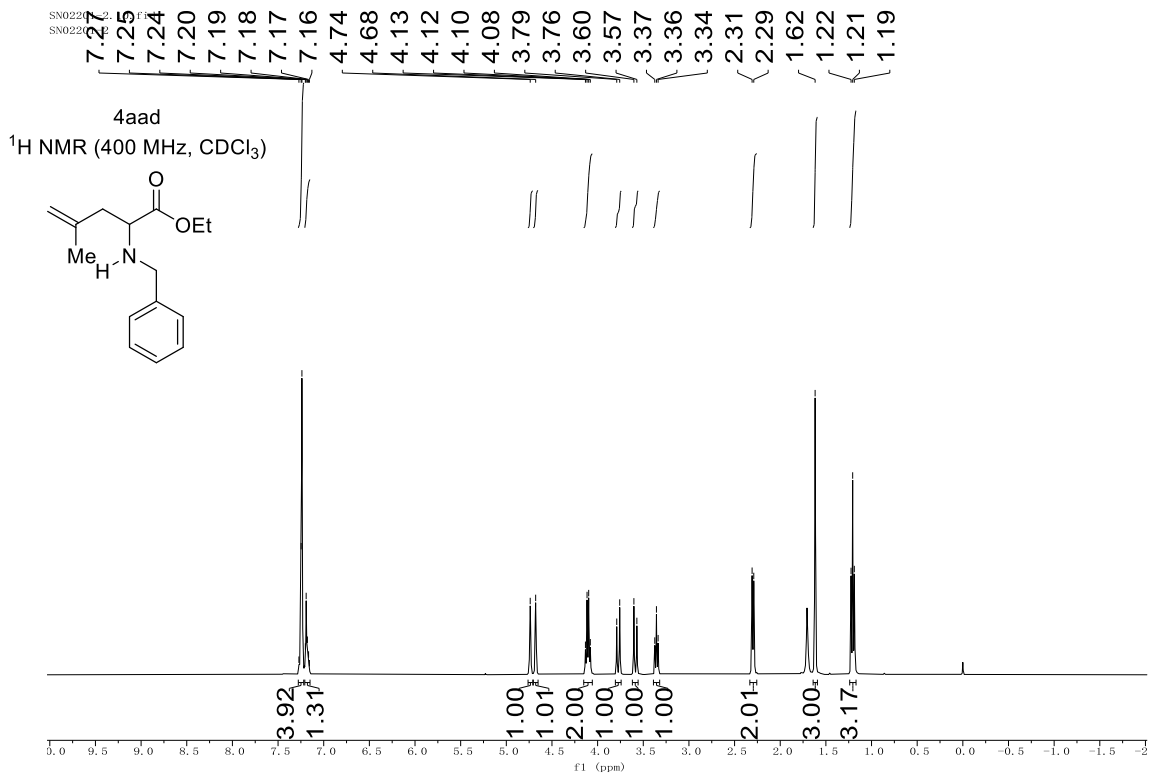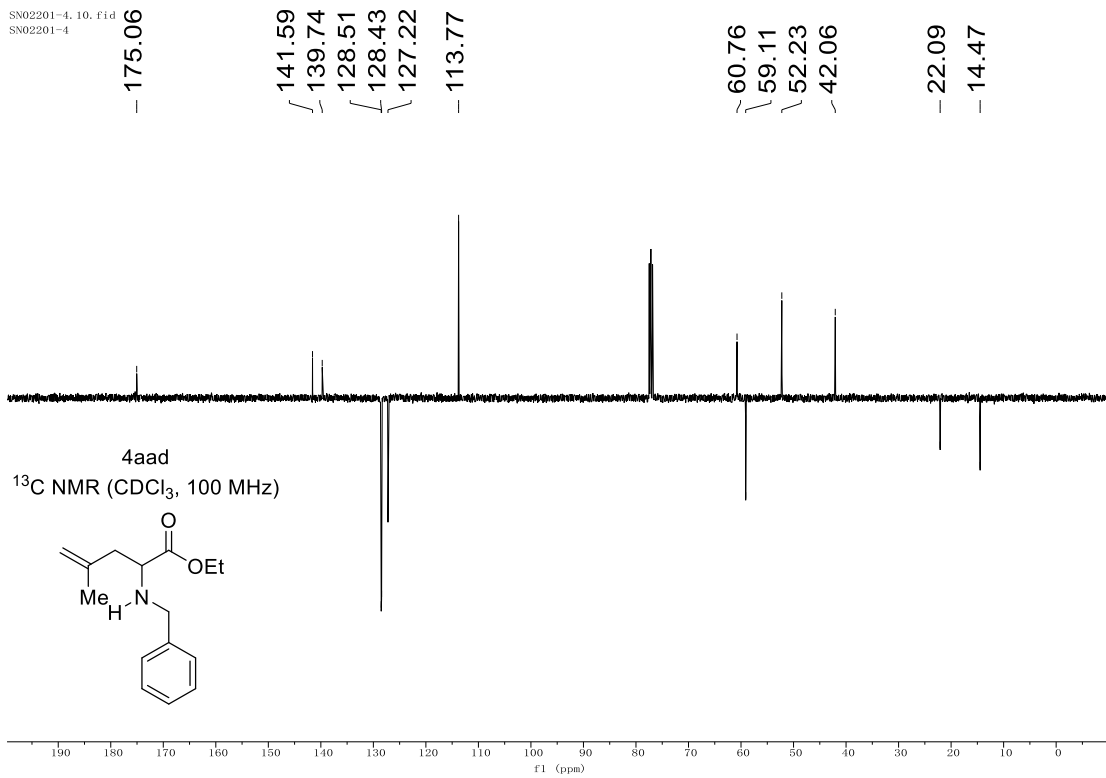

SN02213\_10.fid  
SN02213

4aae  
<sup>1</sup>H NMR (400 MHz, CDCl<sub>3</sub>)

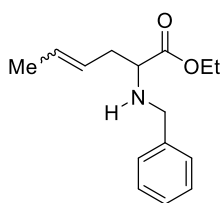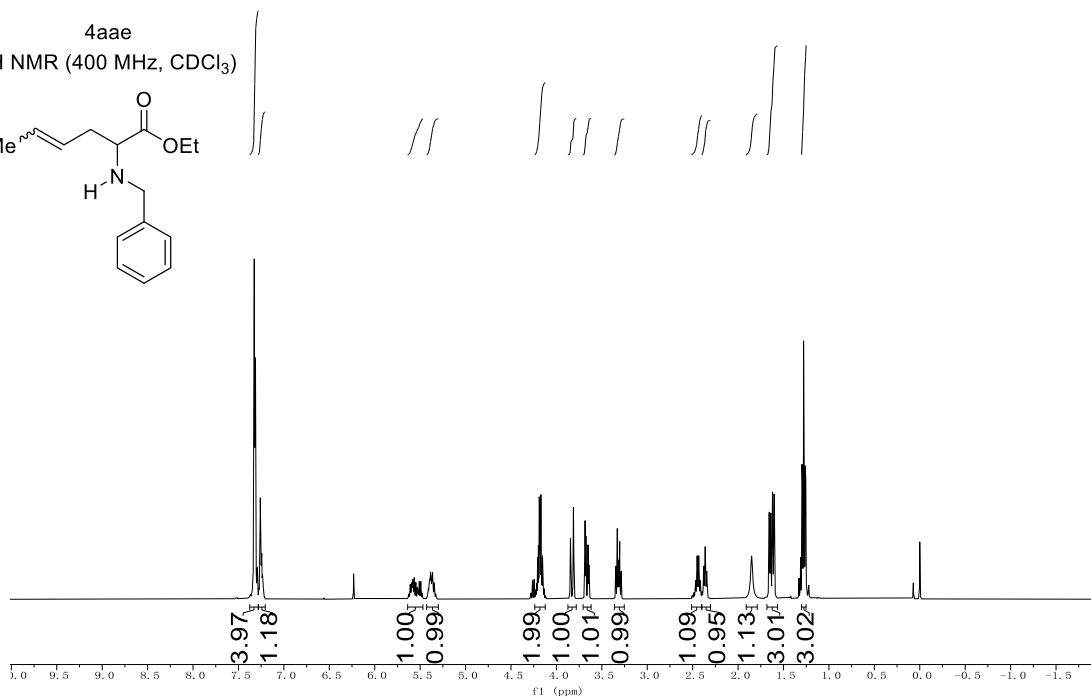

SN02213-2\_10.fid  
SN02213-2

174.75  
174.66

139.84  
128.63  
128.36  
128.30  
128.24  
127.03  
126.95  
125.99  
125.19

60.63  
60.60  
60.56  
60.49  
52.03  
52.00  
36.54  
30.83  
17.97  
14.38  
14.34  
12.94

4aae  
<sup>13</sup>C NMR (CDCl<sub>3</sub>, 100 MHz)

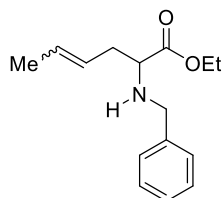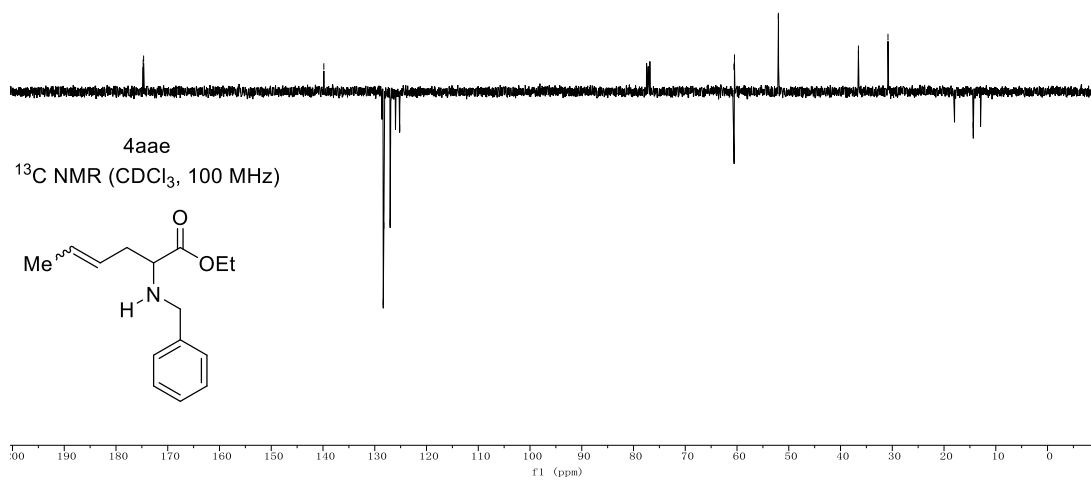

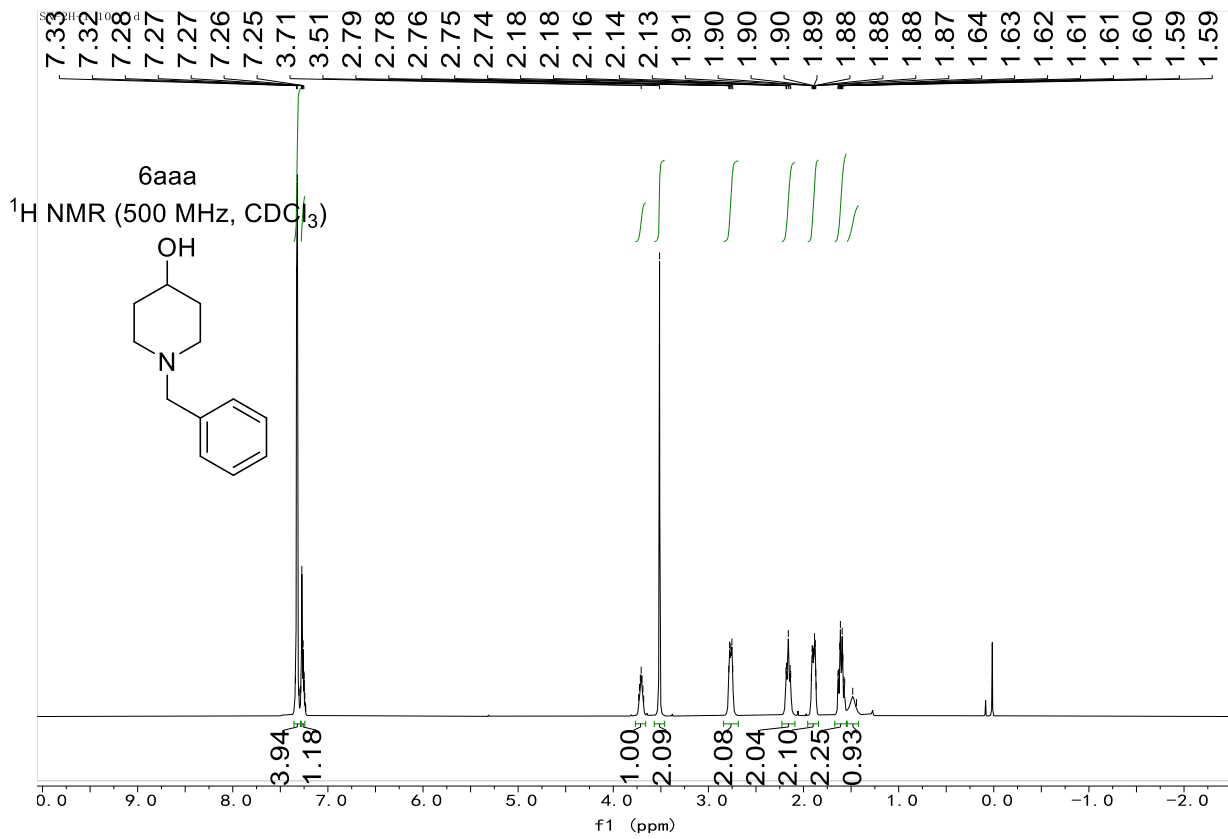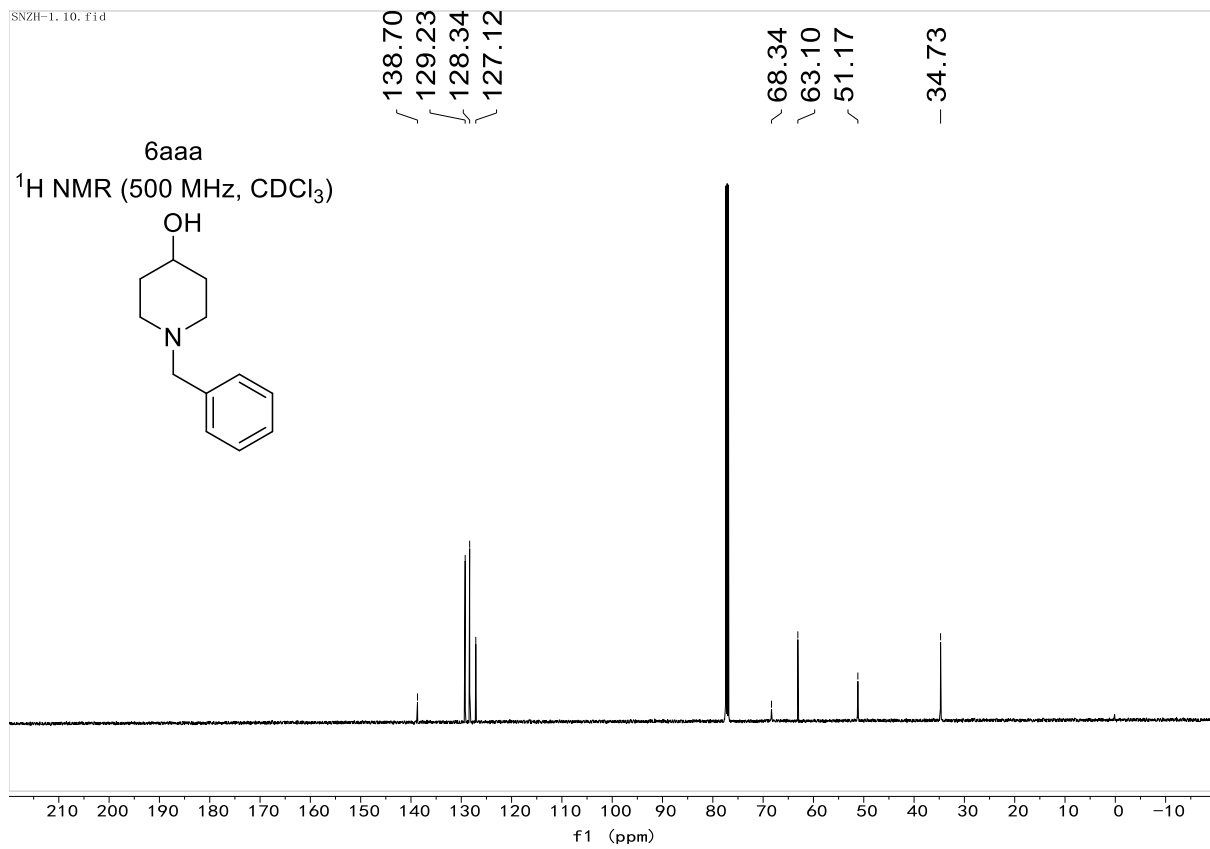

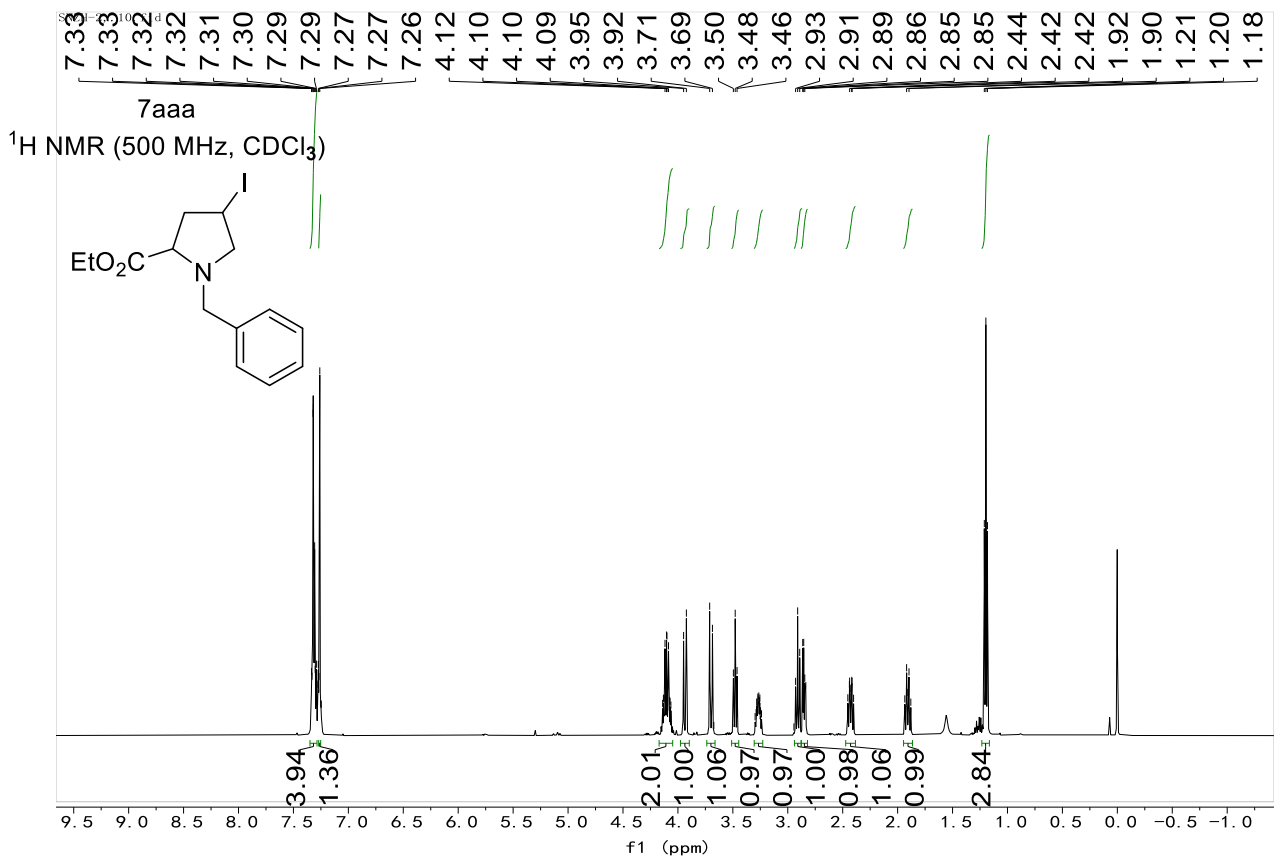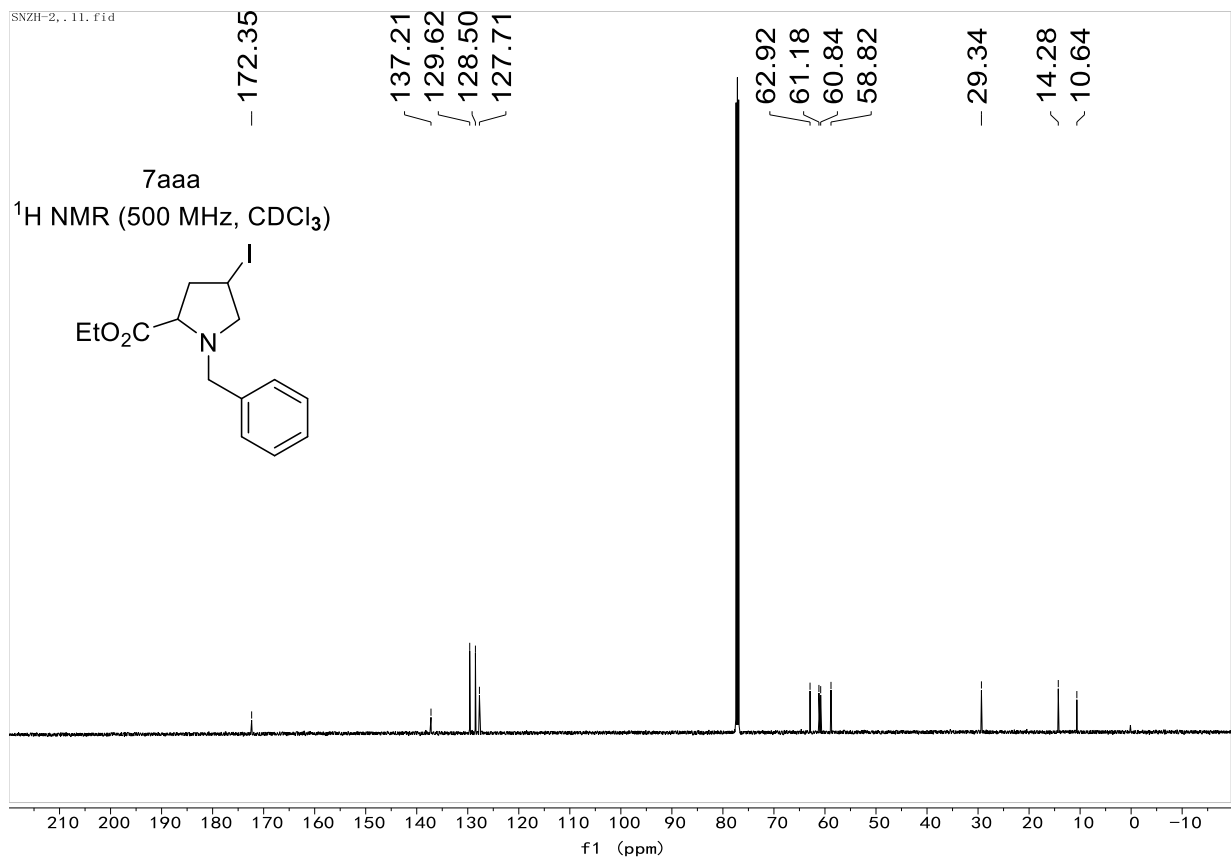

## S.4. X-Ray Data of Compounds 5aab

Crystallographic experimental data and structure refinement parameters are given in **Table 1**.

**Table 1** Crystal Data and Structural Refinement Details for **5aab**

|                                                                              |                                                                                    |
|------------------------------------------------------------------------------|------------------------------------------------------------------------------------|
| complex                                                                      | 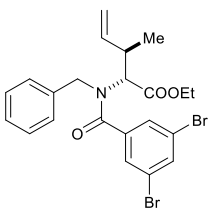 |
| Empirical formula                                                            | C <sub>22</sub> H <sub>23</sub> Br <sub>2</sub> NO <sub>3</sub>                    |
| Formula weight                                                               | 509.23                                                                             |
| Crystal system                                                               | triclinic                                                                          |
| Space group                                                                  | $P\bar{1}$                                                                         |
| Temperature(K)                                                               | 300.0                                                                              |
| <i>a</i> (Å)                                                                 | 8.149(3)                                                                           |
| <i>b</i> (Å)                                                                 | 9.669(3)                                                                           |
| <i>c</i> (Å)                                                                 | 14.769(4)                                                                          |
| $\alpha$ (°)                                                                 | 101.961(9)                                                                         |
| $\beta$ (°)                                                                  | 96.161(10)                                                                         |
| $\gamma$ (°)                                                                 | 95.866(10)                                                                         |
| <i>V</i> (Å <sup>3</sup> )                                                   | 1122.7(6)                                                                          |
| <i>Z</i>                                                                     | 2                                                                                  |
| $\mu$ (mm <sup>-1</sup> )                                                    | 3.631                                                                              |
| Unique reflections                                                           | 4612                                                                               |
| Observed reflections                                                         | 21353                                                                              |
| <i>R</i> <sub>int</sub>                                                      | 0.0343                                                                             |
| <i>R</i> <sub>1</sub> , <i>wR</i> <sub>2</sub> [ <i>I</i> > 2σ ( <i>I</i> )] | 0.0463, 0.1361                                                                     |

$R_1, wR_2$  (all data)

0.0713, 0.1575

X-ray structure of compound

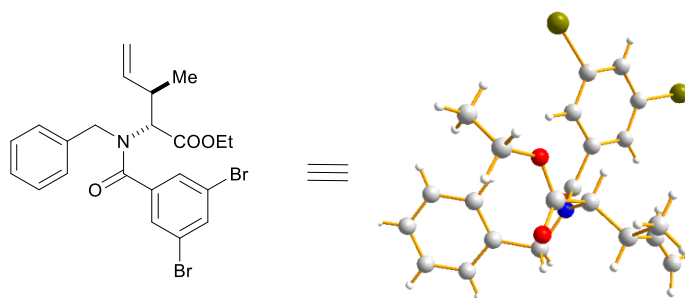

Supplement: d4nj01189a1.pdf [file d4nj01189a1.pdf]
